# Supplementary material
Source: publisher figshare collection journal article supplement (https://sage.figshare.com/ndownloader/files/22659332)
Supplement: Supplementary file 1 [file 22659332]

## Sheet: Table S1
S#	Accession	Length	Genome region	Host	Country	Isolation source	Collection date	Release date	Definition
1	KC164505	30111	orf1a->N	Homo sapiens	United Kingdom		2012-09-11	2012-12-05	Betacoronavirus England 1, complete genome
2	KF961221	30090	orf1a->N	Homo sapiens	Qatar		2013-10-13	2013-12-23	Middle East respiratory syndrome coronavirus isolate Qatar3, complete genome
3	KJ813439	30123	orf1a->N	Homo sapiens	USA	lung,oronasopharynx	2014-04-30	2014-05-13	Middle East respiratory syndrome coronavirus strain Indiana/USA-1_Saudi Arabia_2014, complete genome
4	KJ829365	30123	orf1a->N	Homo sapiens	USA	lung,oronasopharynx	2014-05-10	2014-05-14	Middle East respiratory syndrome coronavirus strain Florida/USA-2_Saudi Arabia_2014, complete genome
5	KP209306	30123	orf1a->N	Homo sapiens	United Arab Emirates	lung	2014-04-07	2014-12-06	Middle East respiratory syndrome coronavirus strain Abu Dhabi_UAE_8_2014, complete genome
6	KP209307	30123	orf1a->N	Homo sapiens	United Arab Emirates	lung,oronasopharynx	2014-04-10	2014-12-06	Middle East respiratory syndrome coronavirus strain Abu Dhabi_UAE_18_2014, complete genome
7	KP209308	30123	orf1a->N	Homo sapiens	United Arab Emirates	lung,oronasopharynx	2014-04-10	2014-12-06	Middle East respiratory syndrome coronavirus strain Abu Dhabi_UAE_16_2014, complete genome
8	KP209309	30123	orf1a->N	Homo sapiens	United Arab Emirates	lung,oronasopharynx	2014-04-19	2014-12-06	Middle East respiratory syndrome coronavirus strain Abu Dhabi_UAE_30_2014, complete genome
9	KP209310	30123	orf1a->N	Homo sapiens	United Arab Emirates	lung,oronasopharynx	2014-03-07	2014-12-06	Middle East respiratory syndrome coronavirus strain Abu Dhabi/Gayathi_UAE_2_2014, complete genome
10	KP209311	30123	orf1a->N	Homo sapiens	United Arab Emirates	lung,oronasopharynx	2014-04-17	2014-12-06	Middle East respiratory syndrome coronavirus strain Abu Dhabi_UAE_33_2014, complete genome
11	KP209312	30123	orf1a->N	Homo sapiens	United Arab Emirates	lung	2013-11-15	2014-12-06	Middle East respiratory syndrome coronavirus strain Abu Dhabi_UAE_9_2013, complete genome
12	KP209313	30123	orf1a->N	Homo sapiens	United Arab Emirates	lung,oronasopharynx	2014-04-13	2014-12-06	Middle East respiratory syndrome coronavirus strain Abu Dhabi_UAE_26_2014, complete genome
13	KP223131	30123	orf1a->N	Homo sapiens	USA	lung,oronasopharynx	2014/06	2014-12-14	Middle East respiratory syndrome coronavirus isolate Florida/USA-2_Saudi Arabia_2014, complete genome
14	KR011263	30096	orf1a->N	Homo sapiens	Saudi Arabia	lung,oronasopharynx	2015-01-21	2015-05-27	Middle East respiratory syndrome coronavirus strain Hu/Riyadh-KSA-2345/2015, complete genome
15	KR011264	30096	orf1a->N	Homo sapiens	Saudi Arabia	lung,oronasopharynx	2015-01-21	2015-05-27	Middle East respiratory syndrome coronavirus strain Hu/Riyadh-KSA-2343/2015, complete genome
16	KR011265	30096	orf1a->N	Homo sapiens	Saudi Arabia	lung,oronasopharynx	2015-01-26	2015-05-27	Middle East respiratory syndrome coronavirus strain Hu/Riyadh-KSA-2466/2015, complete genome
17	KR011266	30096	orf1a->N	Homo sapiens	Saudi Arabia	lung,oronasopharynx	2015-01-06	2015-05-27	Middle East respiratory syndrome coronavirus strain Hu/Riyadh-KSA-2049/2015, complete genome
18	KT026453	30114	orf1a->N	Homo sapiens	Saudi Arabia	lung	2015-02-10	2015-06-08	Middle East respiratory syndrome coronavirus strain Hu/Riyadh_KSA_2959_2015, complete genome
19	KT026454	30123	orf1a->N	Homo sapiens	Saudi Arabia	oronasopharynx	2015-03-01	2015-06-08	Middle East respiratory syndrome coronavirus strain Hu/Riyadh_KSA_4050_2015, complete genome
20	KT026455	30114	orf1a->N	Homo sapiens	Saudi Arabia	lung	2015-02-10	2015-06-08	Middle East respiratory syndrome coronavirus isolate Hu/Riyadh_KSA_2959_2015, complete genome
21	KT026456	30120	orf1a->N	Homo sapiens	Saudi Arabia	oronasopharynx	2015-03-01	2015-06-08	Middle East respiratory syndrome coronavirus isolate Hu/Riyadh_KSA_4050_2015, complete genome
22	KT029139	30108	orf1a->N	Homo sapiens	South Korea	lung,oronasopharynx	2015-05-20	2015-06-09	Middle East respiratory syndrome coronavirus isolate MERS-CoV/KOR/KNIH/002_05_2015, complete genome
23	KT156560	30123	orf1a->N	Homo sapiens	Oman	oronasopharynx	2013-10-28	2015-06-23	Middle East respiratory syndrome coronavirus strain Hu/Oman_2285_2013, complete genome
24	KT156561	30123	orf1a->N	Homo sapiens	Oman	oronasopharynx	2013-12-28	2015-06-23	Middle East respiratory syndrome coronavirus strain Hu/Oman_2874_2013, complete genome
25	KT121572	29896	orf1a->N	Homo sapiens	Saudi Arabia		2014-05-12	2015-11-17	Middle East respiratory syndrome coronavirus isolate KFMC-5, complete genome
26	KT121573	29896	orf1a->N	Homo sapiens	Saudi Arabia		2014-05-09	2015-11-17	Middle East respiratory syndrome coronavirus isolate KFMC-3, complete genome
27	KT121574	29896	orf1a->N	Homo sapiens	Saudi Arabia		2014-05-07	2015-11-17	Middle East respiratory syndrome coronavirus isolate KFMC-9, complete genome
28	KT121575	29896	orf1a->N	Homo sapiens	Saudi Arabia		2014-05-12	2015-11-17	Middle East respiratory syndrome coronavirus isolate KFMC-4, complete genome
29	KT121576	29896	orf1a->N	Homo sapiens	Saudi Arabia		2014-05-18	2015-11-17	Middle East respiratory syndrome coronavirus isolate KFMC-6, complete genome
30	KT121577	29896	orf1a->N	Homo sapiens	Saudi Arabia		2014-05-11	2015-11-17	Middle East respiratory syndrome coronavirus isolate KFMC-2, complete genome
31	KT121578	29785	orf1a->N	Homo sapiens	Saudi Arabia		2014-05-01	2015-11-17	Middle East respiratory syndrome coronavirus isolate KFMC-10, complete genome
32	KT121579	29751	orf1a->N	Homo sapiens	Saudi Arabia		2014-04-30	2015-11-17	Middle East respiratory syndrome coronavirus isolate KFMC-8, complete genome
33	KT121580	29799	orf1a->N	Homo sapiens	Saudi Arabia		2014-04-28	2015-11-17	Middle East respiratory syndrome coronavirus isolate KFMC-1, complete genome
34	KT121581	29751	orf1a->N	Homo sapiens	Saudi Arabia		2014-05-03	2015-11-17	Middle East respiratory syndrome coronavirus isolate KFMC-7, complete genome
35	JX869059	30119	orf1a->orf8b	Homo sapiens			2012-06-13	2012-09-27	Human betacoronavirus 2c EMC/2012, complete genome
36	KC667074	30112	orf1a->orf8b	Homo sapiens	United Kingdom		2012-09-19	2013-02-27	Human betacoronavirus 2c England-Qatar/2012, complete genome
37	KC776174	30030	orf1a->orf8b	Homo sapiens	Jordan	lung	2012/04	2013-03-25	Human betacoronavirus 2c Jordan-N3/2012, complete genome
38	KF186564	30081	orf1a->orf8b	Homo sapiens	Saudi Arabia		2013-05-01	2013-06-10	Middle East respiratory syndrome coronavirus isolate Al-Hasa_4_2013, complete genome
39	KF186565	30069	orf1a->orf8b	Homo sapiens	Saudi Arabia		2013-04-22	2013-06-10	Middle East respiratory syndrome coronavirus isolate Al-Hasa_3_2013, complete genome
40	KF186566	30113	orf1a->orf8b	Homo sapiens	Saudi Arabia		2013-04-21	2013-06-10	Middle East respiratory syndrome coronavirus isolate Al-Hasa_2_2013, complete genome
41	KF186567	30117	orf1a->orf8b	Homo sapiens	Saudi Arabia		2013-05-09	2013-06-10	Middle East respiratory syndrome coronavirus isolate Al-Hasa_1_2013, complete genome
42	KF192507	30123	orf1a->orf8b	Homo sapiens	United Arab Emirates		2013	2013-06-10	Middle East respiratory syndrome coronavirus, complete genome
43	KF600612	30063	orf1a->orf8b	Homo sapiens	Saudi Arabia		2012-10-23	2013-09-17	Middle East respiratory syndrome coronavirus isolate Riyadh_1_2012, complete genome
44	KF600613	30064	orf1a->orf8b	Homo sapiens	Saudi Arabia		2013-02-05	2013-09-17	Middle East respiratory syndrome coronavirus isolate Riyadh_3_2013, complete genome
45	KF600620	30056	orf1a->orf8b	Homo sapiens	Saudi Arabia		2012-06-19	2013-09-17	Middle East respiratory syndrome coronavirus isolate Bisha_1_2012, complete genome
46	KF600627	30076	orf1a->orf8b	Homo sapiens	Saudi Arabia		2013-05-07	2013-09-17	Middle East respiratory syndrome coronavirus isolate Al-Hasa_12_2013, complete genome
47	KF600628	30104	orf1a->orf8b	Homo sapiens	Saudi Arabia		2013-06-04	2013-09-17	Middle East respiratory syndrome coronavirus isolate Hafr-Al-Batin_1_2013, complete genome
48	KF600630	30081	orf1a->orf8b	Homo sapiens	Saudi Arabia		2013-05-13	2013-09-17	Middle East respiratory syndrome coronavirus isolate Buraidah_1_2013, complete genome
49	KF600632	30108	orf1a->orf8b	Homo sapiens	Saudi Arabia		2013-05-23	2013-09-17	Middle East respiratory syndrome coronavirus isolate Al-Hasa_19_2013, complete genome
50	KF600634	30063	orf1a->orf8b	Homo sapiens	Saudi Arabia		2013-05-30	2013-09-17	Middle East respiratory syndrome coronavirus isolate Al-Hasa_21_2013, complete genome
51	KF600644	30078	orf1a->orf8b	Homo sapiens	Saudi Arabia		2013-05-12	2013-09-17	Middle East respiratory syndrome coronavirus isolate Al-Hasa_16_2013, complete genome
52	KF600645	30071	orf1a->orf8b	Homo sapiens	Saudi Arabia		2013-05-11	2013-09-17	Middle East respiratory syndrome coronavirus isolate Al-Hasa_15_2013, complete genome
53	KF600647	30115	orf1a->orf8b	Homo sapiens	Saudi Arabia		2013-05-15	2013-09-17	Middle East respiratory syndrome coronavirus isolate Al-Hasa_17_2013, complete genome
54	KF600651	30105	orf1a->orf8b	Homo sapiens	Saudi Arabia		2013-05-23	2013-09-17	Middle East respiratory syndrome coronavirus isolate Al-Hasa_18_2013, complete genome
55	KF600652	30082	orf1a->orf8b	Homo sapiens	Saudi Arabia		2012-10-30	2013-09-17	Middle East respiratory syndrome coronavirus isolate Riyadh_2_2012, complete genome
56	KF745068	29901	orf1a->orf8b	Homo sapiens	France	lung,oronasopharynx	2013-05-07	2013-12-07	Middle East respiratory syndrome coronavirus isolate FRA/UAE, complete genome
57	KF958702	29851	orf1a->orf8b	Homo sapiens	Saudi Arabia		2013-11-05	2014-05-01	Middle East respiratory syndrome coronavirus isolate MERS-CoV-Jeddah-human-1, complete genome
58	KF961222	30086	orf1a->orf8b	Homo sapiens	Qatar		2013-10-17	2013-12-23	Middle East respiratory syndrome coronavirus isolate Qatar4, complete genome
59	KJ156866	30054	orf1a->orf8b	Homo sapiens	Saudi Arabia		2013-05-02	2014-02-06	Middle East respiratory syndrome coronavirus isolate Al-Hasa_25_2013, complete genome
60	KJ156869	30055	orf1a->orf8b	Homo sapiens	Saudi Arabia		2013-07-17	2014-02-06	Middle East respiratory syndrome coronavirus isolate Riyadh_9_2013, complete genome
61	KJ156874	30055	orf1a->orf8b	Homo sapiens	Saudi Arabia		2013-08-28	2014-02-06	Middle East respiratory syndrome coronavirus isolate Hafr-Al-Batin_6_2013, complete genome
62	KJ156881	30055	orf1a->orf8b	Homo sapiens	Saudi Arabia		2013-06-12	2014-02-06	Middle East respiratory syndrome coronavirus isolate Wadi-Ad-Dawasir_1_2013, complete genome
63	KJ156910	30055	orf1a->orf8b	Homo sapiens	Saudi Arabia		2013-08-05	2014-02-06	Middle East respiratory syndrome coronavirus isolate Hafr-Al-Batin_2_2013, complete genome
64	KJ156934	30055	orf1a->orf8b	Homo sapiens	Saudi Arabia		2013-08-15	2014-02-06	Middle East respiratory syndrome coronavirus isolate Riyadh_14_2013, complete genome
65	KJ156944	30055	orf1a->orf8b	Homo sapiens	Saudi Arabia		2013-07-02	2014-02-06	Middle East respiratory syndrome coronavirus isolate Riyadh_5_2013, complete genome
66	KJ156949	30055	orf1a->orf8b	Homo sapiens	Saudi Arabia		2013-06-12	2014-02-06	Middle East respiratory syndrome coronavirus isolate Taif_1_2013, complete genome
67	KJ156952	30054	orf1a->orf8b	Homo sapiens	Saudi Arabia		2013-03-01	2014-02-06	Middle East respiratory syndrome coronavirus isolate Riyadh_4_2013, complete genome
68	KJ361500	29267	orf1a->orf8b	Homo sapiens	France	lung	2013-04-26	2015-03-10	Middle East respiratory syndrome coronavirus isolate Hu-France (UAE) - FRA1_1627-2013_BAL_Sanger, complete genome
69	KJ361501	29880	orf1a->orf8b	Homo sapiens	France	oronasopharynx	2013-05-07	2015-03-10	Middle East respiratory syndrome coronavirus isolate Hu-France - FRA2_130569-2013_IS_HTS, complete genome
70	KJ361502	29783	orf1a->orf8b	Homo sapiens	France	oronasopharynx	2013-05-07	2015-03-10	Middle East respiratory syndrome coronavirus isolate Hu-France - FRA2_130569-2013_InSpu_Sanger, complete genome
71	KJ361503	30040	orf1a->orf8b	Homo sapiens	France	lung,oronasopharynx	2013-05-07	2015-03-10	Middle East respiratory syndrome coronavirus isolate Hu-France - FRA2_130569-2013_Isolate_Sanger, complete genome
72	KJ556336	29890	orf1a->orf8b	Homo sapiens	Saudi Arabia		2013-11-06	2014-03-24	Middle East respiratory syndrome coronavirus isolate Jeddah_1_2013, complete genome
73	KJ614529	30094	orf1a->orf8b	Homo sapiens	Jordan		2012	2014-05-04	Human betacoronavirus 2c Jordan-N3/2012 isolate MG167, complete genome
74	KM015348	30042	orf1a->orf8b	Homo sapiens	United Kingdom	oronasopharynx	2013-02-10	2014-06-18	Middle East respiratory syndrome coronavirus isolate England/2/2013, complete genome
75	KM027255	29919	orf1a->orf8b	Homo sapiens	Saudi Arabia		2014	2014-11-12	Middle East respiratory syndrome coronavirus isolate Jeddah_C7149/KSA/2014-04-05, complete genome
76	KM027256	29918	orf1a->orf8b	Homo sapiens	Saudi Arabia		2014	2014-11-12	Middle East respiratory syndrome coronavirus isolate Jeddah_C7569/KSA/2014-04-03, complete genome
77	KM027257	29774	orf1a->orf8b	Homo sapiens	Saudi Arabia		2014-04-07	2014-11-12	Middle East respiratory syndrome coronavirus isolate Jeddah_C7770/KSA/2014-04-07, complete genome
78	KM027258	29809	orf1a->orf8b	Homo sapiens	Saudi Arabia		2014-04-12	2014-11-12	Middle East respiratory syndrome coronavirus isolate Jeddah_C8826/KSA/2014-04-12, complete genome
79	KM027259	29918	orf1a->orf8b	Homo sapiens	Saudi Arabia		2014-04-14	2014-11-12	Middle East respiratory syndrome coronavirus isolate Jeddah_C9055/KSA/2014-04-14, complete genome
80	KM027260	29874	orf1a->orf8b	Homo sapiens	Saudi Arabia		2014-04-21	2014-11-12	Middle East respiratory syndrome coronavirus isolate Jeddah_C10306/KSA/2014-04-20, complete genome
81	KM027261	29809	orf1a->orf8b	Homo sapiens	Saudi Arabia		2014-04-15	2014-11-12	Middle East respiratory syndrome coronavirus isolate Makkah_C9355/KSA/Makkah/2014-04-15, complete genome
82	KM027262	29896	orf1a->orf8b	Homo sapiens	Saudi Arabia		2014-04-22	2014-11-12	Middle East respiratory syndrome coronavirus isolate Riyadh_2014KSA_683/KSA/2014, complete genome
83	KM210277	30031	orf1a->orf8b	Homo sapiens	United Kingdom	lung,oronasopharynx	2013-02-13	2015-01-18	Middle East respiratory syndrome coronavirus isolate England/4/2013, complete genome
84	KM210278	30035	orf1a->orf8b	Homo sapiens	United Kingdom	oronasopharynx	2013-02-10	2015-01-18	Middle East respiratory syndrome coronavirus isolate England/3/2013, complete genome
85	KT006149	30114	orf1a->orf8b	Homo sapiens	China	oronasopharynx	2015-05-27	2015-06-05	Middle East respiratory syndrome coronavirus strain ChinaGD01, complete genome
86	KT225476	29809	orf1a->orf8b	Homo sapiens	Thailand	lung,oronasopharynx	2015-06-17	2015-07-07	Middle East respiratory syndrome coronavirus isolate MERS-CoV/THA/CU/17_06_2015, complete genome
87	KT326819	29995	orf1a->orf8b	Homo sapiens	South Korea	lung,oronasopharynx	2015-05-22	2017-07-25	Middle East respiratory syndrome coronavirus strain MERS-CoV/KOR/KNIH/001_05_2015, complete genome
88	KT374050	29831	orf1a->orf8b	Homo sapiens	South Korea	lung,oronasopharynx	2015-06-29	2015-11-24	Middle East respiratory syndrome coronavirus isolate KOREA/Seoul/163-2-2015, complete genome
89	KT374051	29831	orf1a->orf8b	Homo sapiens	South Korea	lung,oronasopharynx	2015-06-19	2015-11-24	Middle East respiratory syndrome coronavirus isolate KOREA/Seoul/163-1-2015, complete genome
90	KT374052	29831	orf1a->orf8b	Homo sapiens	South Korea	lung	2015-05-31	2015-11-24	Middle East respiratory syndrome coronavirus isolate KOREA/Seoul/014-1-2015, complete genome
91	KT374053	29831	orf1a->orf8b	Homo sapiens	South Korea	lung,oronasopharynx	2015-06-13	2015-11-24	Middle East respiratory syndrome coronavirus isolate KOREA/Seoul/014-2-2015, complete genome
92	KT374054	29831	orf1a->orf8b	Homo sapiens	South Korea	lung,oronasopharynx	2015-06-03	2015-11-24	Middle East respiratory syndrome coronavirus isolate KOREA/Seoul/035-1-2015, complete genome
93	KT374055	29831	orf1a->orf8b	Homo sapiens	South Korea	lung	2015-06-18	2015-11-24	Middle East respiratory syndrome coronavirus isolate KOREA/Seoul/035-2-2015, complete genome
94	KT374056	29831	orf1a->orf8b	Homo sapiens	South Korea	lung,oronasopharynx	2015-06-21	2015-11-24	Middle East respiratory syndrome coronavirus isolate KOREA/Seoul/168-1-2015, complete genome
95	KT374057	29831	orf1a->orf8b	Homo sapiens	South Korea	lung,oronasopharynx	2015-06-24	2015-11-24	Middle East respiratory syndrome coronavirus isolate KOREA/Seoul/168-2-2015, complete genome
96	KT806044	30096	orf1a->orf8b	Homo sapiens	Saudi Arabia	lung,oronasopharynx	2015-02-09	2016-01-13	Middle East respiratory syndrome coronavirus isolate Hu/Jeddah-KSA-C20843/2015, complete genome
97	KT806045	30096	orf1a->orf8b	Homo sapiens	Saudi Arabia	lung,oronasopharynx	2015-02-22	2016-01-13	Middle East respiratory syndrome coronavirus isolate Hu/Jeddah-KSA-C21271/2015, complete genome
98	KT806046	30096	orf1a->orf8b	Homo sapiens	Saudi Arabia	lung,oronasopharynx	2015-05-10	2016-01-13	Middle East respiratory syndrome coronavirus isolate Hu/Hufuf-KSA-11002/2015, complete genome
99	KT806047	30087	orf1a->orf8b	Homo sapiens	Saudi Arabia	lung,oronasopharynx	2015-03-27	2016-01-13	Middle East respiratory syndrome coronavirus isolate Hu/Hufuf-KSA-9158/2015, complete genome
100	KT806048	30096	orf1a->orf8b	Homo sapiens	Saudi Arabia	lung,oronasopharynx	2015-02-07	2016-01-13	Middle East respiratory syndrome coronavirus isolate Hu/Khobar-KSA-6736/2015, complete genome
101	KT806049	30096	orf1a->orf8b	Homo sapiens	Saudi Arabia	lung,oronasopharynx	2015-02-15	2016-01-13	Middle East respiratory syndrome coronavirus isolate Hu/Riyadh-KSA-3181/2015, complete genome
102	KT806051	30096	orf1a->orf8b	Homo sapiens	Saudi Arabia	lung,oronasopharynx	2015-02-05	2016-01-13	Middle East respiratory syndrome coronavirus isolate Hu/Riyadh-KSA-2716/2015, complete genome
103	KT806052	30096	orf1a->orf8b	Homo sapiens	Saudi Arabia	lung,oronasopharynx	2015-02-02	2016-01-13	Middle East respiratory syndrome coronavirus isolate Hu/Kharj-KSA-2599/2015, complete genome
104	KT806053	30096	orf1a->orf8b	Homo sapiens	Saudi Arabia		2015-02-02	2016-01-13	Middle East respiratory syndrome coronavirus isolate Hu/Kharj-KSA-2598/2015, complete genome
105	KT806054	29695	orf1a->orf8b	Homo sapiens	Saudi Arabia	lung,oronasopharynx	2015-02-13	2016-01-13	Middle East respiratory syndrome coronavirus isolate Hu/Najran-KSA-C20915/2015, complete genome
106	KT806055	30096	orf1a->orf8b	Homo sapiens	Saudi Arabia	lung,oronasopharynx	2015-02-10	2016-01-13	Middle East respiratory syndrome coronavirus isolate Hu/Jeddah-KSA-C20860/2015, complete genome
107	KT861627	30089	orf1a->orf8b	Homo sapiens	Jordan	lung,oronasopharynx	2014-01-22	2016-10-02	Middle East respiratory syndrome coronavirus isolate Hu/Jordan-20140010168/2014, complete genome
108	KT861628	30096	orf1a->orf8b	Homo sapiens	Jordan	lung,oronasopharynx	2014-04-21	2016-10-02	Middle East respiratory syndrome coronavirus isolate Hu/Jordan-201440011123/2014, complete genome
109	KU308549	30119	orf1a->orf8b	Homo sapiens	South Korea	lung,oronasopharynx	2015-06-08	2016-03-01	Middle East respiratory syndrome coronavirus isolate Korea/Seoul/SNU1-035/2015, complete genome
110	KU710264	30096	orf1a->orf8b	Homo sapiens	Saudi Arabia	blood	2014-11-04	2016-08-12	Middle East respiratory syndrome coronavirus isolate Hu/Taif/KSA-7032/2014, complete genome
111	KU710265	29566	orf1a->orf8b	Homo sapiens	Saudi Arabia	blood	2014-11-04	2016-08-12	Middle East respiratory syndrome coronavirus isolate Hu/Taif/KSA-7032/2014/S530del, complete genome
112	KU851859	30076	orf1a->orf8b	Homo sapiens	Saudi Arabia	lung,oronasopharynx	2015-07-12	2016-06-27	Middle East respiratory syndrome coronavirus isolate Hu/Jeddah-KSA-3RS2702/2015, complete genome
113	KU851860	30096	orf1a->orf8b	Homo sapiens	Saudi Arabia	lung,oronasopharynx	2015-08-24	2016-06-27	Middle East respiratory syndrome coronavirus isolate Hu/Riyadh-KSA-16121/2015, complete genome
114	KU851861	30096	orf1a->orf8b	Homo sapiens	Saudi Arabia	lung,oronasopharynx	2015-08-24	2016-06-27	Middle East respiratory syndrome coronavirus isolate Hu/Riyadh-KSA-16120/2015, complete genome
115	KU851862	30096	orf1a->orf8b	Homo sapiens	Saudi Arabia	lung,oronasopharynx	2015-08-24	2016-06-27	Middle East respiratory syndrome coronavirus isolate Hu/Riyadh-KSA-16117/2015, complete genome
116	KU851863	30096	orf1a->orf8b	Homo sapiens	Saudi Arabia	lung,oronasopharynx	2015-08-27	2016-06-27	Middle East respiratory syndrome coronavirus isolate Hu/Riyadh-KSA-16077/2015, complete genome
117	KU851864	30096	orf1a->orf8b	Homo sapiens	Saudi Arabia	lung,oronasopharynx	2015-08-24	2016-06-27	Middle East respiratory syndrome coronavirus isolate Hu/Riyadh-KSA-16098/2015, complete genome
118	KX034094	30111	orf1a->orf8b	Homo sapiens	South Korea	lung,oronasopharynx	2015-06-11	2016-05-08	Middle East respiratory syndrome coronavirus isolate MERS-CoV/KOR/Seoul/050-1-2015, complete genome
119	KX034095	30118	orf1a->orf8b	Homo sapiens	South Korea	lung,oronasopharynx	2015-06-04	2016-05-08	Middle East respiratory syndrome coronavirus isolate MERS-CoV/KOR/Seoul/066-2015, complete genome
120	KX034096	30082	orf1a->orf8b	Homo sapiens	South Korea	lung	2015-06-17	2016-05-08	Middle East respiratory syndrome coronavirus isolate MERS-CoV/KOR/Seoul/077-2-2015, complete genome
121	KX034097	30118	orf1a->orf8b	Homo sapiens	South Korea	lung,oronasopharynx	2015-06-17	2016-05-08	Middle East respiratory syndrome coronavirus isolate MERS-CoV/KOR/Seoul/080-3-2015, complete genome
122	KX034098	30106	orf1a->orf8b	Homo sapiens	South Korea	lung	2015-06-22	2016-05-08	Middle East respiratory syndrome coronavirus isolate MERS-CoV/KOR/Seoul/162-1-2015, complete genome
123	KX034099	30110	orf1a->orf8b	Homo sapiens	South Korea	lung,oronasopharynx	2015-06-26	2016-05-08	Middle East respiratory syndrome coronavirus isolate MERS-CoV/KOR/Seoul/169-2015, complete genome
124	KX034100	30118	orf1a->orf8b	Homo sapiens	South Korea	lung	2015-07-03	2016-05-08	Middle East respiratory syndrome coronavirus isolate MERS-CoV/KOR/Seoul/177-3-2015, complete genome
125	KX154684	30096	orf1a->orf8b	Homo sapiens	Saudi Arabia	lung,oronasopharynx	2016/02	2017-04-30	Middle East respiratory syndrome coronavirus isolate Hu/Riyadh-KSA-11739/2016, complete genome
126	KX154685	30096	orf1a->orf8b	Homo sapiens	Saudi Arabia	lung,oronasopharynx	2016/02	2017-04-30	Middle East respiratory syndrome coronavirus isolate Hu/Riyadh-KSA-11740/2016, complete genome
127	KX154686	30096	orf1a->orf8b	Homo sapiens	Saudi Arabia	lung,oronasopharynx	2016/02	2017-04-30	Middle East respiratory syndrome coronavirus isolate Hu/Riyadh-KSA-11898/2016, complete genome
128	KX154687	30096	orf1a->orf8b	Homo sapiens	Saudi Arabia	lung,oronasopharynx	2016/02	2017-04-30	Middle East respiratory syndrome coronavirus isolate Hu/Riyadh-KSA-11958/2016, complete genome
129	KX154688	30096	orf1a->orf8b	Homo sapiens	Saudi Arabia	lung,oronasopharynx	2016/02	2017-04-30	Middle East respiratory syndrome coronavirus isolate Hu/Riyadh-KSA-12160/2016, complete genome
130	KX154689	30096	orf1a->orf8b	Homo sapiens	Saudi Arabia	lung,oronasopharynx	2016/01	2017-04-30	Middle East respiratory syndrome coronavirus isolate Hu/Riyadh-KSA-10208/2016, complete genome
131	KX154690	30096	orf1a->orf8b	Homo sapiens	Saudi Arabia	lung,oronasopharynx	2016/01	2017-04-30	Middle East respiratory syndrome coronavirus isolate Hu/Jeddah-KSA-161RS1146/2016, complete genome
132	KX154691	30096	orf1a->orf8b	Homo sapiens	Saudi Arabia	lung,oronasopharynx	2016-02-25	2017-04-30	Middle East respiratory syndrome coronavirus isolate Hu/Riyadh-KSA-12832/2016, complete genome
133	KX154692	30096	orf1a->orf8b	Homo sapiens	Saudi Arabia	lung,oronasopharynx	2016-02-27	2017-04-30	Middle East respiratory syndrome coronavirus isolate Hu/Riyadh-KSA-12969/2016, complete genome
134	KX154693	30096	orf1a->orf8b	Homo sapiens	Saudi Arabia	lung,oronasopharynx	2016-02-29	2017-04-30	Middle East respiratory syndrome coronavirus isolate Hu/Riyadh-KSA-13127/2016, complete genome
135	KX154694	30096	orf1a->orf8b	Homo sapiens	Saudi Arabia	lung,oronasopharynx	2016-02-29	2017-04-30	Middle East respiratory syndrome coronavirus isolate Hu/Artawiyah-KSA-13328/2016, complete genome
136	KY581684	30123	orf1a->orf8b	Homo sapiens	United Arab Emirates	lung,oronasopharynx	2013-07-10	2017-12-20	Middle East respiratory syndrome-related coronavirus strain Hu/UAE_002_2013, complete genome
137	KY581685	30123	orf1a->orf8b	Homo sapiens	United Arab Emirates	lung,oronasopharynx	2013-07-12	2017-12-20	Middle East respiratory syndrome-related coronavirus strain Hu/UAE_004_2013, complete genome
138	KY581686	30123	orf1a->orf8b	Homo sapiens	United Arab Emirates	lung,oronasopharynx	2014-04-10	2017-12-20	Middle East respiratory syndrome-related coronavirus strain Hu/UAE_009_2014, complete genome
139	KY581687	30123	orf1a->orf8b	Homo sapiens	United Arab Emirates	lung,oronasopharynx	2013-12-23	2017-12-20	Middle East respiratory syndrome-related coronavirus strain Hu/UAE_011_2013, complete genome
140	KY581688	30123	orf1a->orf8b	Homo sapiens	United Arab Emirates	lung,oronasopharynx	2014-04-10	2017-12-20	Middle East respiratory syndrome-related coronavirus strain Hu/UAE_011_2014, complete genome
141	KY581689	30123	orf1a->orf8b	Homo sapiens	United Arab Emirates	lung,oronasopharynx	2014-04-10	2017-12-20	Middle East respiratory syndrome-related coronavirus strain Hu/UAE_015_2014, complete genome
142	KY581690	30123	orf1a->orf8b	Homo sapiens	United Arab Emirates	lung,oronasopharynx	2014-04-12	2017-12-20	Middle East respiratory syndrome-related coronavirus strain Hu/UAE_017_2014, complete genome
143	KY581691	30123	orf1a->orf8b	Homo sapiens	United Arab Emirates	lung,oronasopharynx	2014-04-14	2017-12-20	Middle East respiratory syndrome-related coronavirus strain Hu/UAE_023_2014, complete genome
144	KY581692	30123	orf1a->orf8b	Homo sapiens	United Arab Emirates	lung,oronasopharynx	2014-04-15	2017-12-20	Middle East respiratory syndrome-related coronavirus strain Hu/UAE_025_2014, complete genome
145	KY581693	30123	orf1a->orf8b	Homo sapiens	United Arab Emirates	lung,oronasopharynx	2014-04-20	2017-12-20	Middle East respiratory syndrome-related coronavirus strain Hu/UAE_032_2014, complete genome
146	KY581694	30123	orf1a->orf8b	Homo sapiens	United Arab Emirates	lung,oronasopharynx	2014	2017-12-20	Middle East respiratory syndrome-related coronavirus strain Hu/UAE_X_2014, complete genome
147	KY673148	30123	orf1a->orf8b	Homo sapiens	Oman	oronasopharynx	2015-01-06	2017-12-31	Middle East respiratory syndrome-related coronavirus strain Hu/Oman_50_2015, complete genome
148	KY688118	30075	orf1a->orf8b	Homo sapiens	Saudi Arabia	lung,oronasopharynx	2015-02-07	2017-12-31	Middle East respiratory syndrome-related coronavirus strain Hu/Khobar-KSA-6736/2015, complete genome
149	KY688119	30061	orf1a->orf8b	Homo sapiens	Saudi Arabia	lung,oronasopharynx	2015-05-01	2017-12-31	Middle East respiratory syndrome-related coronavirus strain Hu/Aseer-KSA-Rs924/2015, complete genome
150	KY688120	30102	orf1a->orf8b	Homo sapiens	Saudi Arabia	lung,oronasopharynx	2015-05-10	2017-12-31	Middle East respiratory syndrome-related coronavirus strain Hu/Hufuf-KSA-11002/2015, complete genome
151	KY688121	30039	orf1a->orf8b	Homo sapiens	Saudi Arabia	lung,oronasopharynx	2015-05-22	2017-12-31	Middle East respiratory syndrome-related coronavirus strain Hu/Hufuf-KSA-11442/2015, complete genome
152	KY688122	30059	orf1a->orf8b	Homo sapiens	Saudi Arabia	lung,oronasopharynx	2015-05-27	2017-12-31	Middle East respiratory syndrome-related coronavirus strain Hu/Hufuf-KSA-11767/2015, complete genome
153	KY688123	30102	orf1a->orf8b	Homo sapiens	Saudi Arabia	lung,oronasopharynx	2015-05-13	2017-12-31	Middle East respiratory syndrome-related coronavirus strain Hu/Hufuf-KSA-11150/2015, complete genome
154	KY688124	30102	orf1a->orf8b	Homo sapiens	Saudi Arabia	lung,oronasopharynx	2015-05-20	2017-12-31	Middle East respiratory syndrome-related coronavirus strain Hu/Hufuf-KSA-11401/2015, complete genome
155	MG011340	30096	orf1a->orf8b	Homo sapiens	Saudi Arabia	lung,oronasopharynx	2016-03-05	2017-10-03	Middle East respiratory syndrome-related coronavirus isolate Hu/Riyadh-KSA-13798/2016, complete genome
156	MG011341	30096	orf1a->orf8b	Homo sapiens	Saudi Arabia	lung,oronasopharynx	2016-03-06	2017-10-03	Middle East respiratory syndrome-related coronavirus isolate Hu/Qasim-KSA-13922/2016, complete genome
157	MG011342	30096	orf1a->orf8b	Homo sapiens	Saudi Arabia	lung,oronasopharynx	2016-03-07	2017-10-03	Middle East respiratory syndrome-related coronavirus isolate Hu/Riyadh-KSA-13984/2016, complete genome
158	MG011343	30096	orf1a->orf8b	Homo sapiens	Saudi Arabia	lung,oronasopharynx	2016-03-12	2017-10-03	Middle East respiratory syndrome-related coronavirus isolate Hu/Riyadh-KSA-14607/2016, complete genome
159	MG011344	30096	orf1a->orf8b	Homo sapiens	Saudi Arabia	lung,oronasopharynx	2016-03-13	2017-10-03	Middle East respiratory syndrome-related coronavirus isolate Hu/Riyadh-KSA-14675/2016, complete genome
160	MG011345	30096	orf1a->orf8b	Homo sapiens	Saudi Arabia	lung,oronasopharynx	2016-03-18	2017-10-03	Middle East respiratory syndrome-related coronavirus isolate Hu/Riyadh-KSA-15385/2016, complete genome
161	MG011346	30096	orf1a->orf8b	Homo sapiens	Saudi Arabia	lung,oronasopharynx	2016-03-14	2017-10-03	Middle East respiratory syndrome-related coronavirus isolate Hu/Riyadh-KSA-14949/2016, complete genome
162	MG011347	30096	orf1a->orf8b	Homo sapiens	Saudi Arabia	lung,oronasopharynx	2016-03-13	2017-10-03	Middle East respiratory syndrome-related coronavirus isolate Hu/Riyadh-KSA-14670/2016, complete genome
163	MG011348	30096	orf1a->orf8b	Homo sapiens	Saudi Arabia	lung,oronasopharynx	2016-04-18	2017-10-03	Middle East respiratory syndrome-related coronavirus isolate Hu/Riyadh-KSA-17756/2016, complete genome
164	MG011349	30096	orf1a->orf8b	Homo sapiens	Saudi Arabia	lung,oronasopharynx	2016-04-13	2017-10-03	Middle East respiratory syndrome-related coronavirus isolate Hu/Riyadh-KSA-17382/2016, complete genome
165	MG011350	30096	orf1a->orf8b	Homo sapiens	Saudi Arabia	lung,oronasopharynx	2016-04-04	2017-10-03	Middle East respiratory syndrome-related coronavirus isolate Hu/Riyadh-KSA-16849/2016, complete genome
166	MG011351	30096	orf1a->orf8b	Homo sapiens	Saudi Arabia	lung,oronasopharynx	2016-04-10	2017-10-03	Middle East respiratory syndrome-related coronavirus isolate Hu/Madinah-KSA-390/2016, complete genome
167	MG011352	30096	orf1a->orf8b	Homo sapiens	Saudi Arabia	lung,oronasopharynx	2016-07-20	2017-10-03	Middle East respiratory syndrome-related coronavirus isolate Hu/Qasim-KSA-893/2016, complete genome
168	MG011353	30096	orf1a->orf8b	Homo sapiens	Saudi Arabia	lung,oronasopharynx	2016-06-01	2017-10-03	Middle East respiratory syndrome-related coronavirus isolate Hu/Riyadh-KSA-19949/2016, complete genome
169	MG011354	30096	orf1a->orf8b	Homo sapiens	Saudi Arabia	lung,oronasopharynx	2016-06-16	2017-10-03	Middle East respiratory syndrome-related coronavirus isolate Hu/Riyadh-KSA-20570/2016, complete genome
170	MG011355	30096	orf1a->orf8b	Homo sapiens	Saudi Arabia	lung,oronasopharynx	2016-07-01	2017-10-03	Middle East respiratory syndrome-related coronavirus isolate Hu/Riyadh-KSA-21155/2016, complete genome
171	MG011356	30096	orf1a->orf8b	Homo sapiens	Saudi Arabia	lung,oronasopharynx	2016-07-12	2017-10-03	Middle East respiratory syndrome-related coronavirus isolate Hu/Riyadh-KSA-21891/2016, complete genome
172	MG011357	30096	orf1a->orf8b	Homo sapiens	Saudi Arabia	lung,oronasopharynx	2016-09-21	2017-10-03	Middle East respiratory syndrome-related coronavirus isolate Hu/Riyadh-KSA-24244/2016, complete genome
173	MG011358	30096	orf1a->orf8b	Homo sapiens	Saudi Arabia	lung,oronasopharynx	2016-09-21	2017-10-03	Middle East respiratory syndrome-related coronavirus isolate Hu/Riyadh-KSA-24241/2016, complete genome
174	MG011359	30096	orf1a->orf8b	Homo sapiens	Saudi Arabia	lung,oronasopharynx	2016-03-29	2017-10-03	Middle East respiratory syndrome-related coronavirus isolate Hu/Riyadh-KSA-16559/2016, complete genome
175	MG011360	30096	orf1a->orf8b	Homo sapiens	Saudi Arabia	lung,oronasopharynx	2017-01-23	2017-10-03	Middle East respiratory syndrome-related coronavirus isolate Hu/Riyadh-KSA-K17000887/2017, complete genome
176	MG011361	30096	orf1a->orf8b	Homo sapiens	Saudi Arabia	lung,oronasopharynx	2017-01-10	2017-10-03	Middle East respiratory syndrome-related coronavirus isolate Hu/Riyadh-KSA-K17000405/2017, complete genome
177	MG011362	30096	orf1a->orf8b	Homo sapiens	Saudi Arabia	lung,oronasopharynx	2016-12-25	2017-10-03	Middle East respiratory syndrome-related coronavirus isolate Hu/Riyadh-KSA-K37029157/2016, complete genome
178	MG366880	30123	orf1a->orf8b	Homo sapiens	Saudi Arabia	oronasopharynx	2015-06-02	2017-12-06	Middle East respiratory syndrome-related coronavirus strain Hu/Riyadh-KSA-7436/2017, complete genome
179	MG366881	30123	orf1a->orf8b	Homo sapiens	Saudi Arabia	oronasopharynx	2015-06-07	2017-12-06	Middle East respiratory syndrome-related coronavirus strain Hu/Riyadh-KSA-8677/2017, complete genome
180	MG366882	30123	orf1a->orf8b	Homo sapiens	Saudi Arabia	oronasopharynx	2015-06-07	2017-12-06	Middle East respiratory syndrome-related coronavirus strain Hu/Riyadh-KSA-8683/2017, complete genome
181	MG366883	30123	orf1a->orf8b	Homo sapiens	Saudi Arabia	oronasopharynx	2015-06-15	2017-12-06	Middle East respiratory syndrome-related coronavirus strain Hu/Riyadh-KSA-10024/2017, complete genome
182	MH013216	30118	orf1a->orf8b	Homo sapiens	Saudi Arabia		2015-10-15	2018-04-10	Middle East respiratory syndrome-related coronavirus strain HCoV-EMC, complete genome
183	MH306207	30119	orf1a->orf8b	Homo sapiens	Saudi Arabia		2016-08-01	2018-05-30	Middle East respiratory syndrome-related coronavirus strain HCoV-EMC, complete genome
184	KJ156873	10327	orf1a->orf8b	Homo sapiens	Saudi Arabia		2013-08-13	2014-02-06	Middle East respiratory syndrome coronavirus isolate Riyadh_13b_2013 ORF1ab gene, partial cds; S protein, ORF3, ORF4a, ORF4b, ORF5, E protein, and M protein genes, complete cds; N protein gene, partial cds; and ORF8b gene, complete cds
185	KJ156905	10013	orf1a->orf8b	Homo sapiens	Saudi Arabia		2013-07-15	2014-02-06	Middle East respiratory syndrome coronavirus isolate Riyadh_7b_2013 ORF1ab gene, partial cds; S protein, ORF3, ORF4a, ORF4b, ORF5, E protein, and M protein genes, complete cds; N protein gene, partial cds; and ORF8b gene, complete cds
186	KJ156876	9861	orf1a->orf8b	Homo sapiens	Saudi Arabia		2013-06-12	2014-02-06	Middle East respiratory syndrome coronavirus isolate Taif_2b_2013 ORF1ab gene, partial cds; and S protein, ORF3, ORF4a, ORF4b, ORF5, E protein, M protein, N protein, and ORF8b genes, complete cds
187	KJ156901	9863	orf1a->orf8b	Homo sapiens	Saudi Arabia		2013-08-08	2014-02-06	Middle East respiratory syndrome coronavirus isolate Riyadh_12b_2013 ORF1ab gene, partial cds; and S protein, ORF3, ORF4a, ORF4b, ORF5, E protein, M protein, N protein, and ORF8b genes, complete cds
188	KJ156939	9861	orf1a->orf8b	Homo sapiens	Saudi Arabia		2013-06-19	2014-02-06	Middle East respiratory syndrome coronavirus isolate Al-Hasa_27b_2013 ORF1ab gene, partial cds; and S protein, ORF3, ORF4a, ORF4b, ORF5, E protein, M protein, N protein, and ORF8b genes, complete cds
189	KJ156911	9161	orf1a->N	Homo sapiens	Saudi Arabia		2013-08-06	2014-02-06	Middle East respiratory syndrome coronavirus isolate Riyadh_11b_2013 ORF1ab gene, partial cds; S protein, ORF3, ORF4a, ORF4b, ORF5, E protein, and M protein genes, complete cds; N protein gene, partial cds; and ORF8b-like gene, complete sequence
190	KJ156872	9202	orf1a->orf8b	Homo sapiens	Saudi Arabia		2013-06-18	2014-02-06	Middle East respiratory syndrome coronavirus isolate Al-Hasa_26c_2013 ORF1ab gene, partial cds; and S protein, ORF3, ORF4a, ORF4b, ORF5, E protein, M protein, N protein, and ORF8b genes, complete cds
191	KJ156888	18853	orf1a->orf1ab	Homo sapiens	Saudi Arabia		2013-08-13	2014-02-06	Middle East respiratory syndrome coronavirus isolate Riyadh_13a_2013 ORF1ab gene, partial cds; and ORF1a gene, complete cds
192	KJ156891	19165	orf1a->orf1ab	Homo sapiens	Saudi Arabia		2013-08-05	2014-02-06	Middle East respiratory syndrome coronavirus isolate Riyadh_10a_2013 ORF1ab gene, partial cds; and ORF1a gene, complete cds
193	KJ156896	18266	orf1a->orf1ab	Homo sapiens	Saudi Arabia		2013-06-12	2014-02-06	Middle East respiratory syndrome coronavirus isolate Taif_2a_2013 ORF1ab gene, partial cds; and ORF1a gene, complete cds
194	KJ156918	18515	orf1a->orf1ab	Homo sapiens	Saudi Arabia		2013-08-26	2014-02-06	Middle East respiratory syndrome coronavirus isolate Riyadh_17a_2013 ORF1ab gene, partial cds; and ORF1a gene, complete cds
195	KJ156926	18570	orf1a->orf1ab	Homo sapiens	Saudi Arabia		2013-08-08	2014-02-06	Middle East respiratory syndrome coronavirus isolate Riyadh_12a_2013 ORF1ab gene, partial cds; and ORF1a gene, complete cds
196	KJ156937	19266	orf1a->orf1ab	Homo sapiens	Saudi Arabia		2013-07-15	2014-02-06	Middle East respiratory syndrome coronavirus isolate Riyadh_7a_2013 ORF1ab gene, partial cds; and ORF1a gene, complete cds
197	KJ156943	18500	orf1a->orf1ab	Homo sapiens	Saudi Arabia		2013-06-19	2014-02-06	Middle East respiratory syndrome coronavirus isolate Al-Hasa_27a_2013 ORF1ab gene, partial cds; and ORF1a gene, complete cds
198	KJ156946	19140	orf1a->orf1ab	Homo sapiens	Saudi Arabia		2013-08-06	2014-02-06	Middle East respiratory syndrome coronavirus isolate Riyadh_11a_2013 ORF1ab gene, partial cds; and ORF1a gene, complete cds
199	KJ156920	7144	orf1ab->S	Homo sapiens	Saudi Arabia		2013-08-26	2014-02-06	Middle East respiratory syndrome coronavirus isolate Riyadh_17b_2013 ORF1ab gene, partial cds; and S protein gene, complete cds
200	KJ156936	5893	orf1ab->S	Homo sapiens	Saudi Arabia		2013-08-05	2014-02-06	Middle East respiratory syndrome coronavirus isolate Riyadh_10b_2013 ORF1ab gene, partial cds; and S protein gene, complete cds
201	KF811036	4062	S	Homo sapiens	Tunisia	blood	2013-05-08	2014-05-19	Middle East respiratory syndrome coronavirus strain Tunisia-Qatar_2013 spike protein gene, complete cds
202	KJ782549	4062	S	Homo sapiens	Greece	oronasopharynx	2014-04-18	2014-05-13	Middle East respiratory syndrome coronavirus strain Greece-Saudi Arabia_2014 S protein (S) gene, complete cds
203	KM027263	4062	S	Homo sapiens	Saudi Arabia		2014	2014-11-12	Middle East respiratory syndrome coronavirus isolate Jeddah_C7058/KSA/2014 spike protein (S) gene, complete cds
204	KM027264	4062	S	Homo sapiens	Saudi Arabia		2014	2014-11-12	Middle East respiratory syndrome coronavirus isolate Jeddah_C7209/KSA/2014 spike protein (S) gene, complete cds
205	KM027265	4062	S	Homo sapiens	Saudi Arabia		2014	2014-11-12	Middle East respiratory syndrome coronavirus isolate Jeddah_C7311/KSA/2014 spike protein (S) gene, complete cds
206	KM027266	4062	S	Homo sapiens	Saudi Arabia		2014	2014-11-12	Middle East respiratory syndrome coronavirus isolate Jeddah_C7312/KSA/2014 spike protein (S) gene, complete cds
207	KM027267	4062	S	Homo sapiens	Saudi Arabia		2014	2014-11-12	Middle East respiratory syndrome coronavirus isolate Jeddah_C7319/KSA/2014 spike protein (S) gene, complete cds
208	KM027268	4062	S	Homo sapiens	Saudi Arabia		2014	2014-11-12	Middle East respiratory syndrome coronavirus isolate Jeddah_C7554/KSA/2014 spike protein (S) gene, complete cds
209	KM027269	4062	S	Homo sapiens	Saudi Arabia		2014	2014-11-12	Middle East respiratory syndrome coronavirus isolate Jeddah_C7720/KSA/2014 spike protein (S) gene, complete cds
210	KM027270	4062	S	Homo sapiens	Saudi Arabia		2014	2014-11-12	Middle East respiratory syndrome coronavirus isolate Jeddah_C7773/KSA/2014 spike protein (S) gene, complete cds
211	KM027271	4062	S	Homo sapiens	Saudi Arabia		2014	2014-11-12	Middle East respiratory syndrome coronavirus isolate Jeddah_C8237/KSA/2014 spike protein (S) gene, complete cds
212	KM027272	4062	S	Homo sapiens	Saudi Arabia		2014	2014-11-12	Middle East respiratory syndrome coronavirus isolate Jeddah_C8493/KSA/2014 spike protein (S) gene, complete cds
213	KM027273	4062	S	Homo sapiens	Saudi Arabia		2014	2014-11-12	Middle East respiratory syndrome coronavirus isolate Jeddah_C8965/KSA/2014 spike protein (S) gene, complete cds
214	KM027274	4062	S	Homo sapiens	Saudi Arabia		2014	2014-11-12	Middle East respiratory syndrome coronavirus isolate Jeddah_C8978/KSA/2014 spike protein (S) gene, complete cds
215	KM027275	4062	S	Homo sapiens	Saudi Arabia		2014	2014-11-12	Middle East respiratory syndrome coronavirus isolate Jeddah_C9282/KSA/2014 spike protein (S) gene, complete cds
216	KM027276	4062	S	Homo sapiens	Saudi Arabia		2014	2014-11-12	Middle East respiratory syndrome coronavirus isolate Jeddah_C9313/KSA/2014 spike protein (S) gene, complete cds
217	KM027277	4062	S	Homo sapiens	Saudi Arabia		2014	2014-11-12	Middle East respiratory syndrome coronavirus isolate Riyadh_2014KSA_042/KSA/2014 spike protein (S) gene, complete cds
218	KM027278	4062	S	Homo sapiens	Saudi Arabia		2014	2014-11-12	Middle East respiratory syndrome coronavirus isolate Riyadh_2014KSA_057/KSA/2014 spike protein (S) gene, complete cds
219	KM027279	4062	S	Homo sapiens	Saudi Arabia		2014	2014-11-12	Middle East respiratory syndrome coronavirus isolate Riyadh_2014KSA_059/KSA/2014 spike protein (S) gene, complete cds
220	KM027280	4062	S	Homo sapiens	Saudi Arabia		2014	2014-11-12	Middle East respiratory syndrome coronavirus isolate Riyadh_2014KSA_150/KSA/2014 spike protein (S) gene, complete cds
221	KM027281	4062	S	Homo sapiens	Saudi Arabia		2014	2014-11-12	Middle East respiratory syndrome coronavirus isolate Riyadh_2014KSA_158/KSA/2014 spike protein (S) gene, complete cds
222	KM027282	4062	S	Homo sapiens	Saudi Arabia		2014	2014-11-12	Middle East respiratory syndrome coronavirus isolate Riyadh_2014KSA_166/KSA/2014 spike protein (S) gene, complete cds
223	KM027283	4062	S	Homo sapiens	Saudi Arabia		2014	2014-11-12	Middle East respiratory syndrome coronavirus isolate Riyadh_2014KSA_167/KSA/2014 spike protein (S) gene, complete cds
224	KM027284	4062	S	Homo sapiens	Saudi Arabia		2014	2014-11-12	Middle East respiratory syndrome coronavirus isolate Riyadh_2014KSA_345/KSA/2014 spike protein (S) gene, complete cds
225	KM027285	4062	S	Homo sapiens	Saudi Arabia		2014	2014-11-12	Middle East respiratory syndrome coronavirus isolate Riyadh_2014KSA_349/KSA/2014 spike protein (S) gene, complete cds
226	KM027286	4062	S	Homo sapiens	Saudi Arabia		2014	2014-11-12	Middle East respiratory syndrome coronavirus isolate Riyadh_2014KSA_351/KSA/2014 spike protein (S) gene, complete cds
227	KM027287	4062	S	Homo sapiens	Saudi Arabia		2014	2014-11-12	Middle East respiratory syndrome coronavirus isolate Riyadh_2014KSA_359/KSA/2014 spike protein (S) gene, complete cds
228	KM027288	4062	S	Homo sapiens	Saudi Arabia		2014	2014-11-12	Middle East respiratory syndrome coronavirus isolate Riyadh_2014KSA_551/KSA/2014 spike protein (S) gene, complete cds
229	KM027289	4062	S	Homo sapiens	Saudi Arabia		2014	2014-11-12	Middle East respiratory syndrome coronavirus isolate Riyadh_2014KSA_564/KSA/2014 spike protein (S) gene, complete cds
230	KM027290	4062	S	Homo sapiens	Saudi Arabia		2014	2014-11-12	Middle East respiratory syndrome coronavirus isolate Riyadh_2014KSA_686/KSA/2014 spike protein (S) gene, complete cds
231	KM027291	4062	S	Homo sapiens	Saudi Arabia		2014	2014-11-12	Middle East respiratory syndrome coronavirus isolate Riyadh_2014KSA_693/KSA/2014 spike protein (S) gene, complete cds
232	KM027292	4062	S	Homo sapiens	Saudi Arabia		2014	2014-11-12	Middle East respiratory syndrome coronavirus isolate Riyadh_2014KSA_695/KSA/2014 spike protein (S) gene, complete cds
233	KP236092	4062	S	Homo sapiens	United Arab Emirates	oronasopharynx	2013-10-29	2014-12-14	Middle East respiratory syndrome coronavirus strain Abu Dhabi/Oman_UAE_7_2013 S protein (S) gene, complete cds
234	KR912187	4062	S	Homo sapiens	Saudi Arabia	blood	2014-11-28	2015-10-21	Middle East respiratory syndrome coronavirus isolate Hu/Taif,KSA-6047/2014 spike protein gene, complete cds
235	KR912188	4062	S	Homo sapiens	Saudi Arabia	blood	2014-11-04	2015-10-21	Middle East respiratory syndrome coronavirus isolate Hu/Taif,KSA-7032/2014 spike protein gene, complete cds
236	KR912189	4062	S	Homo sapiens	Saudi Arabia	blood	2014-11-11	2015-10-21	Middle East respiratory syndrome coronavirus isolate Hu/Taif,KSA-1486/2014 spike protein gene, complete cds
237	KR912190	4062	S	Homo sapiens	Saudi Arabia	blood	2014-10-27	2015-10-21	Middle East respiratory syndrome coronavirus isolate Hu/Taif,KSA-2164/2014 spike protein gene, complete cds
238	KR912191	4062	S	Homo sapiens	Saudi Arabia	blood	2014-09-10	2015-10-21	Middle East respiratory syndrome coronavirus isolate Hu/Taif,KSA-5920/2014 spike protein gene, complete cds
239	KR912192	4062	S	Homo sapiens	Saudi Arabia	blood	2014-10-24	2015-10-21	Middle East respiratory syndrome coronavirus isolate Hu/Taif,KSA-2083/2014 spike protein gene, complete cds
240	KR912193	4062	S	Homo sapiens	Saudi Arabia	blood	2014-10-27	2015-10-21	Middle East respiratory syndrome coronavirus isolate Hu/Taif,KSA-1416/2014 spike protein gene, complete cds
241	KR912194	4062	S	Homo sapiens	Saudi Arabia	blood	2014-10-27	2015-10-21	Middle East respiratory syndrome coronavirus isolate Hu/Taif,KSA-1445/2014 spike protein gene, complete cds
242	KR912195	4062	S	Homo sapiens	Saudi Arabia	blood	2014-11-12	2015-10-21	Middle East respiratory syndrome coronavirus isolate Hu/Taif,KSA-1488/2014 spike protein gene, complete cds
243	KR912196	4062	S	Homo sapiens	Saudi Arabia	blood	2014-11-22	2015-10-21	Middle East respiratory syndrome coronavirus isolate Hu/Taif,KSA-1521/2014 spike protein gene, complete cds
244	KT003530	4062	S	Homo sapiens	China		2015-05-27	2015-11-09	Middle East respiratory syndrome coronavirus isolate ChinaGD01 S protein (S) gene, complete cds
245	KT182953	4062	S	Homo sapiens	South Korea	lung,oronasopharynx	2015-05-28	2016-04-07	Middle East respiratory syndrome coronavirus isolate MERS-CoV/KOR/KNIH/009_05_2015 spike protein (S) gene, complete cds
246	KT182954	4062	S	Homo sapiens	South Korea	lung,oronasopharynx	2015-05-28	2016-04-07	Middle East respiratory syndrome coronavirus isolate MERS-CoV/KOR/KNIH/012_05_2015 spike protein (S) gene, complete cds
247	KT182955	4062	S	Homo sapiens	South Korea	lung,oronasopharynx	2015-05-28	2016-04-07	Middle East respiratory syndrome coronavirus isolate MERS-CoV/KOR/KNIH/013_05_2015 spike protein (S) gene, complete cds
248	KT182956	4062	S	Homo sapiens	South Korea	lung,oronasopharynx	2015-05-30	2016-04-07	Middle East respiratory syndrome coronavirus isolate MERS-CoV/KOR/KNIH/015_05_2015 spike protein (S) gene, complete cds
249	KT182957	4062	S	Homo sapiens	South Korea	lung,oronasopharynx	2015-05-30	2016-04-07	Middle East respiratory syndrome coronavirus isolate MERS-CoV/KOR/KNIH/042_05_2015 spike protein (S) gene, complete cds
250	KT357802	4062	S	Homo sapiens	Saudi Arabia		2014	2016-04-12	Middle East respiratory syndrome coronavirus isolate Riyadh_111/KSA/2014 spike protein gene, complete cds
251	KT357803	4062	S	Homo sapiens	Saudi Arabia		2014	2016-04-12	Middle East respiratory syndrome coronavirus isolate Riyadh_688/KSA/2014 spike protein gene, complete cds
252	KT357804	4062	S	Homo sapiens	Saudi Arabia		2014	2016-04-12	Middle East respiratory syndrome coronavirus isolate Riyadh_1147/KSA/2014 spike protein gene, complete cds
253	KT357805	4062	S	Homo sapiens	Saudi Arabia		2014	2016-04-12	Middle East respiratory syndrome coronavirus isolate HafrAlBatin_696/KSA/2014 spike protein gene, complete cds
254	KT357806	4062	S	Homo sapiens	Saudi Arabia		2014	2016-04-12	Middle East respiratory syndrome coronavirus isolate Riyadh_1158/KSA/2014 spike protein gene, complete cds
255	KT357807	4062	S	Homo sapiens	Saudi Arabia		2014	2016-04-12	Middle East respiratory syndrome coronavirus isolate Riyadh_1162/KSA/2014 spike protein gene, complete cds
256	KT357808	4062	S	Homo sapiens	Saudi Arabia		2014	2016-04-12	Middle East respiratory syndrome coronavirus isolate Riyadh_1164/KSA/2014 spike protein gene, complete cds
257	KT357809	4062	S	Homo sapiens	Saudi Arabia		2014	2016-04-12	Middle East respiratory syndrome coronavirus isolate Riyadh_1172/KSA/2014 spike protein gene, complete cds
258	KT357810	4062	S	Homo sapiens	Saudi Arabia		2014	2016-04-12	Middle East respiratory syndrome coronavirus isolate Riyadh_1175/KSA/2014 spike protein gene, complete cds
259	KT357811	4062	S	Homo sapiens	Saudi Arabia		2014	2016-04-12	Middle East respiratory syndrome coronavirus isolate Riyadh_1337/KSA/2014 spike protein gene, complete cds
260	KT357812	4062	S	Homo sapiens	Saudi Arabia		2014	2016-04-12	Middle East respiratory syndrome coronavirus isolate Riyadh_1340/KSA/2014 spike protein gene, complete cds
261	KT805961	4062	S	Homo sapiens	Saudi Arabia	lung,oronasopharynx	2015-01-14	2016-01-07	Middle East respiratory syndrome coronavirus isolate Hu/Riyadh-KSA-2264/2015 spike protein gene, complete cds
262	KT805962	4062	S	Homo sapiens	Saudi Arabia	lung,oronasopharynx	2015-01-18	2016-01-07	Middle East respiratory syndrome coronavirus isolate Hu/Riyadh-KSA-2276/2015 spike protein gene, complete cds
263	KT805963	4062	S	Homo sapiens	Saudi Arabia	lung,oronasopharynx	2015-01-20	2016-01-07	Middle East respiratory syndrome coronavirus isolate Hu/Riyadh-KSA-2317/2015 spike protein gene, complete cds
264	KT805964	4062	S	Homo sapiens	Saudi Arabia	lung,oronasopharynx	2015-02-02	2016-01-07	Middle East respiratory syndrome coronavirus isolate Hu/Riyadh-KSA-2600/2015 spike protein gene, complete cds
265	KT805965	4062	S	Homo sapiens	Saudi Arabia	lung,oronasopharynx	2015-02-03	2016-01-07	Middle East respiratory syndrome coronavirus isolate Hu/Riyadh-KSA-2622A/2015 spike protein gene, complete cds
266	KT805966	4062	S	Homo sapiens	Saudi Arabia	lung,oronasopharynx	2015-02-20	2016-01-07	Middle East respiratory syndrome coronavirus isolate Hu/Quwaiyah-KSA-3405/2015 spike protein gene, complete cds
267	KT805967	4062	S	Homo sapiens	Saudi Arabia	lung,oronasopharynx	2015-02-18	2016-01-07	Middle East respiratory syndrome coronavirus isolate Hu/Riyadh-KSA-3331/2015 spike protein gene, complete cds
268	KT805968	4062	S	Homo sapiens	Saudi Arabia	lung,oronasopharynx	2015-02-15	2016-01-07	Middle East respiratory syndrome coronavirus isolate Hu/Riyadh-KSA-3160/2015 spike protein gene, complete cds
269	KT805969	4062	S	Homo sapiens	Saudi Arabia	lung,oronasopharynx	2015-02-14	2016-01-07	Middle East respiratory syndrome coronavirus isolate Hu/Riyadh-KSA-3098/2015 spike protein gene, complete cds
270	KT805970	4062	S	Homo sapiens	Saudi Arabia	lung,oronasopharynx	2015-02-12	2016-01-07	Middle East respiratory syndrome coronavirus isolate Hu/Buraydah-KSA-3049/2015 spike protein gene, complete cds
271	KT805971	4062	S	Homo sapiens	Saudi Arabia	lung,oronasopharynx	2015-02-14	2016-01-07	Middle East respiratory syndrome coronavirus isolate Hu/Riyadh-KSA-3123/2015 spike protein gene, complete cds
272	KT805972	4062	S	Homo sapiens	Saudi Arabia	lung,oronasopharynx	2015-02-14	2016-01-07	Middle East respiratory syndrome coronavirus isolate Hu/Jeddah-KSA-C20934/2015 spike protein gene, complete cds
273	KT805973	4062	S	Homo sapiens	Saudi Arabia	lung,oronasopharynx	2015-02-06	2016-01-07	Middle East respiratory syndrome coronavirus isolate Hu/Riyadh-KSA-C20807/2015 spike protein gene, complete cds
274	KT805974	4062	S	Homo sapiens	Saudi Arabia	lung,oronasopharynx	2015-02-28	2016-01-07	Middle East respiratory syndrome coronavirus isolate Hu/Riyadh-KSA-4071/2015 spike protein gene, complete cds
275	KT805975	4062	S	Homo sapiens	Saudi Arabia	lung,oronasopharynx	2015-02-28	2016-01-07	Middle East respiratory syndrome coronavirus isolate Hu/Riyadh-KSA-4067/2015 spike protein gene, complete cds
276	KT805976	4062	S	Homo sapiens	Saudi Arabia	lung,oronasopharynx	2015-02-26	2016-01-07	Middle East respiratory syndrome coronavirus isolate Hu/Riyadh-KSA-3929/2015 spike protein gene, complete cds
277	KT805977	4062	S	Homo sapiens	Saudi Arabia	lung,oronasopharynx	2015-02-23	2016-01-07	Middle East respiratory syndrome coronavirus isolate Hu/Riyadh-KSA-3562/2015 spike protein gene, complete cds
278	KT805978	4062	S	Homo sapiens	Saudi Arabia	lung,oronasopharynx	2015-02-23	2016-01-07	Middle East respiratory syndrome coronavirus isolate Hu/Riyadh-KSA-3550/2015 spike protein gene, complete cds
279	KT805979	4062	S	Homo sapiens	Saudi Arabia	lung,oronasopharynx	2015-02-21	2016-01-07	Middle East respiratory syndrome coronavirus isolate Hu/Riyadh-KSA-3486/2015 spike protein gene, complete cds
280	KT805980	4062	S	Homo sapiens	Saudi Arabia	lung,oronasopharynx	2015-02-21	2016-01-07	Middle East respiratory syndrome coronavirus isolate Hu/Riyadh-KSA-3487/2015 spike protein gene, complete cds
281	KT805981	4062	S	Homo sapiens	Saudi Arabia	lung,oronasopharynx	2015-02-10	2016-01-07	Middle East respiratory syndrome coronavirus isolate Hu/Buraydah-KSA-2937/2015 spike protein gene, complete cds
282	KT805982	4062	S	Homo sapiens	Saudi Arabia	lung,oronasopharynx	2015-01-30	2016-01-07	Middle East respiratory syndrome coronavirus isolate Hu/Hufuf-KSA-6648/2015 spike protein gene, complete cds
283	KT805983	4062	S	Homo sapiens	Saudi Arabia	lung,oronasopharynx	2015-02-01	2016-01-07	Middle East respiratory syndrome coronavirus isolate Hu/Hufuf-KSA-6674/2015 spike protein gene, complete cds
284	KT805984	4062	S	Homo sapiens	Saudi Arabia	lung,oronasopharynx	2015-02-08	2016-01-07	Middle East respiratory syndrome coronavirus isolate Hu/Dhahran-KSA-6740/2015 spike protein gene, complete cds
285	KT805985	4062	S	Homo sapiens	Saudi Arabia	lung,oronasopharynx	2015-03-07	2016-01-07	Middle East respiratory syndrome coronavirus isolate Hu/Hufuf-KSA-8271/2015 spike protein gene, complete cds
286	KT805986	4062	S	Homo sapiens	Saudi Arabia	lung,oronasopharynx	2015-03-12	2016-01-07	Middle East respiratory syndrome coronavirus isolate Hu/Hufuf-KSA-8527/2015 spike protein gene, complete cds
287	KT805987	4062	S	Homo sapiens	Saudi Arabia	lung,oronasopharynx	2015-05-12	2016-01-07	Middle East respiratory syndrome coronavirus isolate Hu/Hufuf-KSA-11080/2015 spike protein gene, complete cds
288	KT805988	4062	S	Homo sapiens	Saudi Arabia	lung,oronasopharynx	2015-05-10	2016-01-07	Middle East respiratory syndrome coronavirus isolate Hu/Buqayq-KSA-11012/2015 spike protein gene, complete cds
289	KT805989	4062	S	Homo sapiens	Saudi Arabia	lung,oronasopharynx	2015-05-13	2016-01-07	Middle East respiratory syndrome coronavirus isolate Hu/Hufuf-KSA-11150/2015 spike protein gene, complete cds
290	KT805990	4062	S	Homo sapiens	Saudi Arabia	lung,oronasopharynx	2015-05-10	2016-01-07	Middle East respiratory syndrome coronavirus isolate Hu/Hufuf-KSA-11003/2015 spike protein gene, complete cds
291	KT805991	4062	S	Homo sapiens	Saudi Arabia	lung,oronasopharynx	2015-05-08	2016-01-07	Middle East respiratory syndrome coronavirus isolate Hu/Najran-KSA-Rs1207/2015 spike protein gene, complete cds
292	KT805992	4062	S	Homo sapiens	Saudi Arabia	lung,oronasopharynx	2015-05-01	2016-01-07	Middle East respiratory syndrome coronavirus isolate Hu/Aseer-KSA-Rs924/2015 spike protein gene, complete cds
293	KT805993	4062	S	Homo sapiens	Saudi Arabia	lung,oronasopharynx	2015-03-05	2016-01-07	Middle East respiratory syndrome coronavirus isolate Hu/Jeddah-KSA-C21760/2015 spike protein gene, complete cds
294	KT805994	4062	S	Homo sapiens	Saudi Arabia	lung,oronasopharynx	2015-03-09	2016-01-07	Middle East respiratory syndrome coronavirus isolate Hu/Jeddah-KSA-C21864/2015 spike protein gene, complete cds
295	KT805995	4062	S	Homo sapiens	Saudi Arabia	lung,oronasopharynx	2015-03-20	2016-01-07	Middle East respiratory syndrome coronavirus isolate Hu/Jeddah-KSA-C22351/2015 spike protein gene, complete cds
296	KT805996	4062	S	Homo sapiens	Saudi Arabia	lung,oronasopharynx	2015-03-21	2016-01-07	Middle East respiratory syndrome coronavirus isolate Hu/Najran-KSA-C22374/2015 spike protein gene, complete cds
297	KT805997	4062	S	Homo sapiens	Saudi Arabia	lung,oronasopharynx	2015-03-29	2016-01-07	Middle East respiratory syndrome coronavirus isolate Hu/Jeddah-KSA-C22744/2015 spike protein gene, complete cds
298	KT805998	4062	S	Homo sapiens	Saudi Arabia	lung,oronasopharynx	2015-03-29	2016-01-07	Middle East respiratory syndrome coronavirus isolate Hu/Jeddah-KSA-C22748/2015 spike protein gene, complete cds
299	KT805999	4062	S	Homo sapiens	Saudi Arabia	lung,oronasopharynx	2015-04-01	2016-01-07	Middle East respiratory syndrome coronavirus isolate Hu/Jeddah-KSA-RS15/2015 spike protein gene, complete cds
300	KT806000	4062	S	Homo sapiens	Saudi Arabia	lung,oronasopharynx	2015-02-10	2016-01-07	Middle East respiratory syndrome coronavirus isolate Hu/Unayzah-KSA-3249/2015 spike protein gene, complete cds
301	KT806001	4062	S	Homo sapiens	Saudi Arabia	lung,oronasopharynx	2015-02-13	2016-01-07	Middle East respiratory syndrome coronavirus isolate Hu/Buraydah-KSA-3319/2015 spike protein gene, complete cds
302	KT806002	4062	S	Homo sapiens	Saudi Arabia	lung,oronasopharynx	2015-02-13	2016-01-07	Middle East respiratory syndrome coronavirus isolate Hu/Buraydah-KSA-3317/2015 spike protein gene, complete cds
303	KT806003	4062	S	Homo sapiens	Saudi Arabia	lung,oronasopharynx	2015-02-13	2016-01-07	Middle East respiratory syndrome coronavirus isolate Hu/Rass-KSA-3318/2015 spike protein gene, complete cds
304	KT806004	4062	S	Homo sapiens	Saudi Arabia	lung,oronasopharynx	2015-02-14	2016-01-07	Middle East respiratory syndrome coronavirus isolate Hu/Buraydah-KSA-3334/2015 spike protein gene, complete cds
305	KT806005	4062	S	Homo sapiens	Saudi Arabia	lung,oronasopharynx	2015-02-25	2016-01-07	Middle East respiratory syndrome coronavirus isolate Hu/Riyadh-KSA-3782/2015 spike protein gene, complete cds
306	KT806006	4062	S	Homo sapiens	Saudi Arabia	lung,oronasopharynx	2015-02-28	2016-01-07	Middle East respiratory syndrome coronavirus isolate Hu/Buraydah-KSA-3818/2015 spike protein gene, complete cds
307	KT806007	4062	S	Homo sapiens	Saudi Arabia	lung,oronasopharynx	2015-03-04	2016-01-07	Middle East respiratory syndrome coronavirus isolate Hu/Riyadh-KSA-4606/2015 spike protein gene, complete cds
308	KT806008	4062	S	Homo sapiens	Saudi Arabia	lung,oronasopharynx	2015-03-04	2016-01-07	Middle East respiratory syndrome coronavirus isolate Hu/Shaqra-KSA-4699/2015 spike protein gene, complete cds
309	KT806009	4062	S	Homo sapiens	Saudi Arabia	lung,oronasopharynx	2015-03-08	2016-01-07	Middle East respiratory syndrome coronavirus isolate Hu/Riyadh-KSA-5390/2015 spike protein gene, complete cds
310	KT806010	4062	S	Homo sapiens	Saudi Arabia	lung,oronasopharynx	2015-03-24	2016-01-07	Middle East respiratory syndrome coronavirus isolate Hu/Riyadh-KSA-7179/2015 spike protein gene, complete cds
311	KT806011	4062	S	Homo sapiens	Saudi Arabia	lung,oronasopharynx	2015-03-25	2016-01-07	Middle East respiratory syndrome coronavirus isolate Hu/Riyadh-KSA-7244/2015 spike protein gene, complete cds
312	KT806012	4062	S	Homo sapiens	Saudi Arabia	lung,oronasopharynx	2015-03-30	2016-01-07	Middle East respiratory syndrome coronavirus isolate Hu/Riyadh-KSA-7591/2015 spike protein gene, complete cds
313	KT806013	4062	S	Homo sapiens	Saudi Arabia	lung,oronasopharynx	2015-04-04	2016-01-07	Middle East respiratory syndrome coronavirus isolate Hu/Makkah-KSA-728/2015 spike protein gene, complete cds
314	KT806014	4062	S	Homo sapiens	Saudi Arabia	lung,oronasopharynx	2015-04-04	2016-01-07	Middle East respiratory syndrome coronavirus isolate Hu/Riyadh-KSA-7867/2015 spike protein gene, complete cds
315	KT806015	4062	S	Homo sapiens	Saudi Arabia	lung,oronasopharynx	2015-04-13	2016-01-07	Middle East respiratory syndrome coronavirus isolate Hu/Makkah-KSA-907/2015 spike protein gene, complete cds
316	KT806016	4062	S	Homo sapiens	Saudi Arabia	lung,oronasopharynx	2015-04-16	2016-01-07	Middle East respiratory syndrome coronavirus isolate Hu/Duba-KSA-313/2015 spike protein gene, complete cds
317	KT806017	4062	S	Homo sapiens	Saudi Arabia	lung,oronasopharynx	2015-05-09	2016-01-07	Middle East respiratory syndrome coronavirus isolate Hu/Taif-KSA-15167/2015 spike protein gene, complete cds
318	KT806018	4062	S	Homo sapiens	Saudi Arabia	lung,oronasopharynx	2015-05-09	2016-01-07	Middle East respiratory syndrome coronavirus isolate Hu/Riyadh-KSA-10131/2015 spike protein gene, complete cds
319	KT806019	4062	S	Homo sapiens	Saudi Arabia	lung,oronasopharynx	2015-05-09	2016-01-07	Middle East respiratory syndrome coronavirus isolate Hu/Riyadh-KSA-10150/2015 spike protein gene, complete cds
320	KT806020	4062	S	Homo sapiens	Saudi Arabia	lung,oronasopharynx	2015-05-10	2016-01-07	Middle East respiratory syndrome coronavirus isolate Hu/Riyadh-KSA-10182/2015 spike protein gene, complete cds
321	KT806021	4062	S	Homo sapiens	Saudi Arabia	lung,oronasopharynx	2015-03-21	2016-01-07	Middle East respiratory syndrome coronavirus isolate Hu/Riyadh-KSA-6966/2015 spike protein gene, complete cds
322	KT806022	4062	S	Homo sapiens	Saudi Arabia	lung,oronasopharynx	2015-05-12	2016-01-07	Middle East respiratory syndrome coronavirus isolate Hu/Qunfidhah-KSA-Rs1338/2015 spike protein gene, complete cds
323	KT806023	4062	S	Homo sapiens	Saudi Arabia	lung,oronasopharynx	2015-05-17	2016-01-07	Middle East respiratory syndrome coronavirus isolate Hu/Aflaj-KSA-10802/2015 spike protein gene, complete cds
324	KT806024	4062	S	Homo sapiens	Saudi Arabia	lung,oronasopharynx	2015-05-20	2016-01-07	Middle East respiratory syndrome coronavirus isolate Hu/Hufuf-KSA-11401/2015 spike protein gene, complete cds
325	KT806025	4062	S	Homo sapiens	Saudi Arabia	lung,oronasopharynx	2015-05-22	2016-01-07	Middle East respiratory syndrome coronavirus isolate Hu/Hufuf-KSA-11442/2015 spike protein gene, complete cds
326	KT806026	4062	S	Homo sapiens	Saudi Arabia	lung,oronasopharynx	2015-05-23	2016-01-07	Middle East respiratory syndrome coronavirus isolate Hu/Hufuf-KSA-11476/2015 spike protein gene, complete cds
327	KT806027	4062	S	Homo sapiens	Saudi Arabia	lung,oronasopharynx	2015-05-29	2016-01-07	Middle East respiratory syndrome coronavirus isolate Hu/Hufuf-KSA-11882/2015 spike protein gene, complete cds
328	KT806028	4062	S	Homo sapiens	Saudi Arabia	lung,oronasopharynx	2015-05-29	2016-01-07	Middle East respiratory syndrome coronavirus isolate Hu/Hufuf-KSA-11905/2015 spike protein gene, complete cds
329	KT806029	4062	S	Homo sapiens	Saudi Arabia	lung,oronasopharynx	2015-05-28	2016-01-07	Middle East respiratory syndrome coronavirus isolate Hu/Hufuf-KSA-11869/2015 spike protein gene, complete cds
330	KT806030	4062	S	Homo sapiens	Saudi Arabia	lung,oronasopharynx	2015-05-28	2016-01-07	Middle East respiratory syndrome coronavirus isolate Hu/Hufuf-KSA-11853/2015 spike protein gene, complete cds
331	KT806031	4062	S	Homo sapiens	Saudi Arabia	lung,oronasopharynx	2015-05-27	2016-01-07	Middle East respiratory syndrome coronavirus isolate Hu/Hufuf-KSA-11767/2015 spike protein gene, complete cds
332	KT806032	4062	S	Homo sapiens	Saudi Arabia	lung,oronasopharynx	2015-05-27	2016-01-07	Middle East respiratory syndrome coronavirus isolate Hu/Hufuf-KSA-11765/2015 spike protein gene, complete cds
333	KT806033	4062	S	Homo sapiens	Saudi Arabia	lung,oronasopharynx	2015-04-25	2016-01-07	Middle East respiratory syndrome coronavirus isolate Hu/Hufuf-KSA-10357/2015 spike protein gene, complete cds
334	KT806034	4062	S	Homo sapiens	Saudi Arabia	lung,oronasopharynx	2015-05-29	2016-01-07	Middle East respiratory syndrome coronavirus isolate Hu/Hufuf-KSA-11876/2015 spike protein gene, complete cds
335	KT806035	4062	S	Homo sapiens	Saudi Arabia	lung,oronasopharynx	2015-06-01	2016-01-07	Middle East respiratory syndrome coronavirus isolate Hu/Hufuf-KSA-12055/2015 spike protein gene, complete cds
336	KT806036	4062	S	Homo sapiens	Saudi Arabia	lung,oronasopharynx	2015-06-02	2016-01-07	Middle East respiratory syndrome coronavirus isolate Hu/Hufuf-KSA-12124/2015 spike protein gene, complete cds
337	KT806037	4062	S	Homo sapiens	Saudi Arabia	lung,oronasopharynx	2015-06-03	2016-01-07	Middle East respiratory syndrome coronavirus isolate Hu/Hufuf-KSA-12177/2015 spike protein gene, complete cds
338	KT806038	4062	S	Homo sapiens	Saudi Arabia	lung,oronasopharynx	2015-06-04	2016-01-07	Middle East respiratory syndrome coronavirus isolate Hu/Hufuf-KSA-12225/2015 spike protein gene, complete cds
339	KT806039	4062	S	Homo sapiens	Saudi Arabia	lung,oronasopharynx	2015-06-07	2016-01-07	Middle East respiratory syndrome coronavirus isolate Hu/Hufuf-KSA-12354/2015 spike protein gene, complete cds
340	KT806040	4062	S	Homo sapiens	Saudi Arabia	lung,oronasopharynx	2015-06-13	2016-01-07	Middle East respiratory syndrome coronavirus isolate Hu/Hufuf-KSA-12597/2015 spike protein gene, complete cds
341	KT806041	4062	S	Homo sapiens	Saudi Arabia	lung,oronasopharynx	2015-05-12	2016-01-07	Middle East respiratory syndrome coronavirus isolate Hu/Hufuf-KSA-11078/2015 spike protein gene, complete cds
342	KT861629	4062	S	Homo sapiens	Jordan	lung,oronasopharynx	2014-04-07	2016-09-30	Middle East respiratory syndrome coronavirus isolate Hu/Jordan-201440010988/2014 spike protein gene, complete cds
343	KT861630	4062	S	Homo sapiens	Jordan	lung,oronasopharynx	2014-04-30	2016-09-30	Middle East respiratory syndrome coronavirus isolate Hu/Jordan-201440011200/2014 spike protein gene, complete cds
344	KT861631	4062	S	Homo sapiens	Jordan	lung,oronasopharynx	2014-05-10	2016-09-30	Middle East respiratory syndrome coronavirus isolate Hu/Jordan-201440011365/2014 spike protein gene, complete cds
345	KT861632	4062	S	Homo sapiens	Jordan	lung,oronasopharynx	2014-12-24	2016-09-30	Middle East respiratory syndrome coronavirus isolate Hu/Jordan-20140013526/2014 spike protein gene, complete cds
346	KT861633	4062	S	Homo sapiens	Jordan	lung,oronasopharynx	2014-05-04	2016-09-30	Middle East respiratory syndrome coronavirus isolate Hu/Jordan-201440011246/2014 spike protein gene, complete cds
347	KY673146	4062	S	Homo sapiens	United Arab Emirates	lung,oronasopharynx	2013-07-12	2017-12-20	Middle East respiratory syndrome-related coronavirus strain Hu/UAE_003_2013 S protein (S) gene, complete cds
348	KY673147	4062	S	Homo sapiens	United Arab Emirates	lung,oronasopharynx	2014-04-25	2017-12-20	Middle East respiratory syndrome-related coronavirus strain Hu/UAE_045_2014 S protein (S) gene, complete cds
349	KY688114	4062	S	Homo sapiens	Oman	oronasopharynx	2015-01-16	2017-12-31	Middle East respiratory syndrome-related coronavirus strain Hu/Oman_261_2015 spike glycoprotein (S) gene, complete cds
350	KT002190	312	orf3	Homo sapiens	China	oronasopharynx	2015-05-27	2015-11-11	Middle East respiratory syndrome coronavirus isolate ChinaGD01 ORF3 gene, complete cds
351	KT624244	312	orf3	Homo sapiens	Saudi Arabia		2008-12-15	2016-02-07	Middle East respiratory syndrome coronavirus strain Dammam 1/2014 ORF3 gene, complete cds
352	KT624245	312	orf3	Homo sapiens	Saudi Arabia		2008-12-15	2016-02-07	Middle East respiratory syndrome coronavirus strain Dammam 2/2014 ORF3 gene, complete cds
353	KT624246	312	orf3	Homo sapiens	Saudi Arabia		2008-12-15	2016-02-07	Middle East respiratory syndrome coronavirus strain Madinah 4/2014 ORF3 gene, complete cds
354	KT624247	312	orf3	Homo sapiens	Saudi Arabia		2008-12-15	2016-02-07	Middle East respiratory syndrome coronavirus strain Riyadh 11/2014 ORF3 gene, complete cds
355	KT002191	330	orf4a	Homo sapiens	China	oronasopharynx	2015-05-27	2015-11-11	Middle East respiratory syndrome coronavirus isolate ChinaGD01 ORF4a gene, complete cds
356	KJ156915	2188	orf4a->E	Homo sapiens	Saudi Arabia		2013-06-13	2014-02-06	Middle East respiratory syndrome coronavirus ORF4a, ORF4b, ORF5, and E protein genes, complete cds
357	KJ156865	4303	orf4a->N	Homo sapiens	Saudi Arabia		2013-08-26	2014-02-06	Middle East respiratory syndrome coronavirus isolate Riyadh_17c_2013 ORF4a, ORF4b, ORF5, E protein, M protein, and N protein genes, complete cds; and ORF8b-like gene, complete sequence
358	KJ156907	3374	orf4a->N	Homo sapiens	Saudi Arabia		2013-08-05	2014-02-06	Middle East respiratory syndrome coronavirus isolate Riyadh_10c_2013 ORF4a, ORF4b, ORF5, E protein, and M protein genes, complete cds; N protein gene, partial cds; and ORF8b-like gene, complete sequence
359	KJ156933	1633	orf4a->orf5	Homo sapiens	Saudi Arabia		2013-08-19	2014-02-06	Middle East respiratory syndrome coronavirus ORF4a and ORF4b genes, complete cds; and ORF5 gene, partial cds
360	KJ858500	764	orf4b	Homo sapiens	Netherlands		2014-05-13	2014-05-22	Middle East respiratory syndrome coronavirus isolate Netherlands_1_2014 NS4b protein (ns4b) gene, complete cds
361	KT002192	741	orf4b	Homo sapiens	China	oronasopharynx	2015-05-27	2015-11-11	Middle East respiratory syndrome coronavirus isolate ChinaGD01 ORF4b gene, complete cds
362	KT624248	741	orf4b	Homo sapiens	Saudi Arabia		2008-12-15	2016-02-07	Middle East respiratory syndrome coronavirus strain Dammam 1/2014 ORF4b gene, complete cds
363	KT624249	741	orf4b	Homo sapiens	Saudi Arabia		2008-12-15	2016-02-07	Middle East respiratory syndrome coronavirus strain Dammam 2/2014 ORF4b gene, complete cds
364	KT624250	741	orf4b	Homo sapiens	Saudi Arabia		2008-12-15	2016-02-07	Middle East respiratory syndrome coronavirus strain Madinah 4/2014 ORF4b gene, complete cds
365	KT624251	741	orf4b	Homo sapiens	Saudi Arabia		2008-12-15	2016-02-07	Middle East respiratory syndrome coronavirus strain Riyadh 11/2014 ORF4b gene, complete cds
366	KJ156923	1965	orf4b->M	Homo sapiens	Saudi Arabia		2013-05-13	2014-02-06	Middle East respiratory syndrome coronavirus ORF4b, ORF5, and E protein genes, complete cds; and M protein gene, partial cds
367	KJ156927	4159	orf4b->orf8b	Homo sapiens	Saudi Arabia		2013-07-02	2014-02-06	Middle East respiratory syndrome coronavirus ORF4b, ORF5, E protein, M protein, N protein, and ORF8b genes, complete cds
368	KT002193	675	orf5	Homo sapiens	China	oronasopharynx	2015-05-27	2015-11-11	Middle East respiratory syndrome coronavirus isolate ChinaGD01 ORF5 gene, complete cds
369	KT002189	249	E	Homo sapiens	China	oronasopharynx	2015-05-27	2015-11-11	Middle East respiratory syndrome coronavirus isolate ChinaGD01 E protein gene, complete cds
370	KT003528	660	M	Homo sapiens	China		2015-05-27	2015-11-09	Middle East respiratory syndrome coronavirus isolate ChinaGD01 M protein (M) gene, complete cds
371	KJ156917	2033	M->N	Homo sapiens	Saudi Arabia		2013-09-01	2014-02-06	Middle East respiratory syndrome coronavirus isolate Madinah_1c_2013 M protein gene, partial cds; N protein gene, complete cds; and ORF8b-like gene, complete sequence
372	KJ156861	2043	M->orf8b	Homo sapiens	Saudi Arabia		2013-08-25	2014-02-06	Middle East respiratory syndrome coronavirus isolate Hafr-Al-Batin_4d_2013 M protein gene, partial cds; and N protein and ORF8b genes, complete cds
373	KJ156871	2043	M->orf8b	Homo sapiens	Saudi Arabia		2013-06-13	2014-02-06	Middle East respiratory syndrome coronavirus isolate Taif_4b_2013 M protein gene, partial cds; and N protein and ORF8b genes, complete cds
374	KJ156906	2024	M->orf8b	Homo sapiens	Saudi Arabia		2013-06-13	2014-02-06	Middle East respiratory syndrome coronavirus isolate Taif_3g_2013 M protein gene, partial cds; and N protein and ORF8b genes, complete cds
375	KJ156913	2043	M->orf8b	Homo sapiens	Saudi Arabia		2013-08-25	2014-02-06	Middle East respiratory syndrome coronavirus isolate Hafr-Al-Batin_5d_2013 M protein gene, partial cds; and N protein and ORF8b genes, complete cds
376	KJ156932	2036	M->orf8b	Homo sapiens	Saudi Arabia		2013-08-05	2014-02-06	Middle East respiratory syndrome coronavirus isolate Asir_2g_2013 M protein gene, partial cds; and N protein and ORF8b genes, complete cds
377	KF811035	1242	N	Homo sapiens	Tunisia	blood	2013-05-08	2014-05-19	Middle East respiratory syndrome coronavirus strain Tunisia-Qatar_2013 nucleocapsid protein gene, complete cds
378	KJ782550	1242	N	Homo sapiens	Greece	oronasopharynx	2014-04-18	2014-05-13	Middle East respiratory syndrome coronavirus strain Greece-Saudi Arabia_2014 N protein (N) gene, complete cds
379	KP236093	1242	N	Homo sapiens	United Arab Emirates	oronasopharynx	2013-10-29	2014-12-14	Middle East respiratory syndrome coronavirus strain Abu Dhabi/Oman_UAE_7_2013 N protein (N) gene, complete cds
380	KP769415	1242	N	Homo sapiens	Malaysia		2014-04-13	2015-06-15	Middle East respiratory syndrome coronavirus isolate MyH010414 nucleocapsid (N) gene, complete cds
381	KT003529	1242	N	Homo sapiens	China		2015-05-27	2015-11-09	Middle East respiratory syndrome coronavirus isolate ChinaGD01 N protein (N) gene, complete cds
382	KY673143	1242	N	Homo sapiens	United Arab Emirates	lung,oronasopharynx	2013-07-12	2017-12-20	Middle East respiratory syndrome-related coronavirus strain Hu/UAE_003_2013 N protein (N) gene, complete cds
383	KY673144	1242	N	Homo sapiens	United Arab Emirates	lung,oronasopharynx	2013-11-24	2017-12-20	Middle East respiratory syndrome-related coronavirus strain Hu/UAE_008_2013 N protein (N) gene, complete cds
384	KY673145	1242	N	Homo sapiens	United Arab Emirates	lung,oronasopharynx	2014-04-25	2017-12-20	Middle East respiratory syndrome-related coronavirus strain Hu/UAE_045_2014 N protein (N) gene, complete cds
385	KY688115	1242	N	Homo sapiens	Oman	blood	2015-01-11	2017-12-31	Middle East respiratory syndrome-related coronavirus strain Hu/Oman_110_2015 nucleoprotein (N) gene, complete cds
386	KY688116	1242	N	Homo sapiens	Oman	oronasopharynx	2015-01-16	2017-12-31	Middle East respiratory syndrome-related coronavirus strain Hu/Oman_261_2015 nucleoprotein (N) gene, complete cds
387	KY688117	1242	N	Homo sapiens	Oman	oronasopharynx	2015-05-30	2017-12-31	Middle East respiratory syndrome-related coronavirus strain Hu/Oman_3311_2015 nucleoprotein (N) gene, complete cds
388	KJ156862	1641	N->orf8b	Homo sapiens	Saudi Arabia		2013-05-13	2014-02-06	Middle East respiratory syndrome coronavirus isolate Al-Hasa_23e_2013 N protein and ORF8b genes, complete cds
389	KJ156883	1638	N->orf8b	Homo sapiens	Saudi Arabia		2013-07-02	2014-02-06	Middle East respiratory syndrome coronavirus isolate Asir_1d_2013 N protein and ORF8b genes, complete cds
390	KJ156902	1577	N->orf8b	Homo sapiens	Saudi Arabia		2013-05-01	2014-02-06	Middle East respiratory syndrome coronavirus isolate Al-Hasa_24g_2013 N protein and ORF8b genes, complete cds
391	KJ156909	1714	N->orf8b	Homo sapiens	Saudi Arabia		2013-06-22	2014-02-06	Middle East respiratory syndrome coronavirus isolate Al-Hasa_28h_2013 N protein and ORF8b genes, complete cds
392	KJ156953	1671	N->orf8b	Homo sapiens	Saudi Arabia		2013-08-19	2014-02-06	Middle East respiratory syndrome coronavirus isolate Riyadh_15f_2013 N protein and ORF8b genes, complete cds
393	KT002194	339	orf8b	Homo sapiens	China	oronasopharynx	2015-05-27	2015-11-11	Middle East respiratory syndrome coronavirus isolate ChinaGD01 ORF8b gene, complete cds
394	KT275306	8951	orf1a->N	Camelus dromedarius	United Arab Emirates		2015-05-09	2015-12-17	Middle East respiratory syndrome coronavirus isolate ADFCA-HKU1 ORF1b gene, partial cds; and spike protein, ORF3, ORF4a, ORF4b, ORF5, envelope protein, membrane protein, and nucleocapsid genes, complete cds
395	KT275307	8951	orf1a->N	Camelus dromedarius	United Arab Emirates		2015-05-09	2015-12-17	Middle East respiratory syndrome coronavirus isolate ADFCA-HKU2 ORF1b gene, partial cds; and spike protein, ORF3, ORF4a, ORF4b, ORF5, envelope protein, membrane protein, and nucleocapsid genes, complete cds
396	KT275308	8951	orf1a->N	Camelus dromedarius	United Arab Emirates		2015-05-09	2015-12-17	Middle East respiratory syndrome coronavirus isolate ADFCA-HKU3 ORF1b gene, partial cds; and spike protein, ORF3, ORF4a, ORF4b, ORF5, envelope protein, membrane protein, and nucleocapsid genes, complete cds
397	KJ477102	29908	orf1a->N	Camelus dromedarius	Egypt		2013	2014-03-04	Middle East respiratory syndrome coronavirus, complete genome
398	KJ650295	30100	orf1a->N	Camelus dromedarius	Saudi Arabia		2013-12-30	2014-04-22	Middle East respiratory syndrome coronavirus isolate KFU-HKU 13, complete genome
399	KJ650296	30099	orf1a->N	Camelus dromedarius	Saudi Arabia		2013-12-30	2014-04-22	Middle East respiratory syndrome coronavirus isolate KFU-HKU 19Dam, complete genome
400	KJ650297	30105	orf1a->N	Camelus dromedarius	Saudi Arabia		2013-11-30	2014-04-22	Middle East respiratory syndrome coronavirus isolate KFU-HKU 1, complete genome
401	KU242423	30112	orf1a->orf8b	Camelus dromedarius	United Arab Emirates		2014-03-12	2015-12-27	Middle East respiratory syndrome coronavirus isolate Camel/UAE/D511-14, complete genome
402	KU242424	30112	orf1a->orf8b	Camelus dromedarius	United Arab Emirates		2014-03-04	2015-12-27	Middle East respiratory syndrome coronavirus isolate Camel/UAE/D469-14, complete genome
403	KF917527	29851	orf1a->orf8b	Camelus dromedarius	Saudi Arabia		2013-11-08	2014-05-01	Middle East respiratory syndrome coronavirus isolate MERS-CoV-Jeddah-Camel-1, complete genome
404	KJ650098	30117	orf1a->orf8b	Camelus dromedarius	Qatar		2014-02-16	2014-05-05	Middle East respiratory syndrome coronavirus isolate Camel/Qatar_2_2014, complete genome
405	KJ713295	30113	orf1a->orf8b	Camelus dromedarius	Saudi Arabia	oronasopharynx	2013/11	2014-05-04	Middle East respiratory syndrome coronavirus isolate KSA-CAMEL-505, complete genome
406	KJ713296	30113	orf1a->orf8b	Camelus dromedarius	Saudi Arabia	oronasopharynx	2013/11	2014-05-04	Middle East respiratory syndrome coronavirus isolate KSA-CAMEL-378, complete genome
407	KJ713297	30114	orf1a->orf8b	Camelus dromedarius	Saudi Arabia	oronasopharynx	2013/11	2014-05-04	Middle East respiratory syndrome coronavirus isolate KSA-CAMEL-503, complete genome
408	KJ713298	30083	orf1a->orf8b	Camelus dromedarius	Saudi Arabia	oronasopharynx	2013/11	2014-05-04	Middle East respiratory syndrome coronavirus isolate KSA-CAMEL-363, complete genome
409	KJ713299	30116	orf1a->orf8b	Camelus dromedarius	Saudi Arabia	oronasopharynx	2013/11	2014-05-04	Middle East respiratory syndrome coronavirus isolate KSA-CAMEL-376, complete genome
410	KP719927	29559	orf1a->orf8b	Camelus dromedarius	United Arab Emirates		2014/06	2015-02-09	Middle East respiratory syndrome coronavirus isolate Camel/UAE/D1164.9/2014, complete genome
411	KP719928	29559	orf1a->orf8b	Camelus dromedarius	United Arab Emirates		2014/06	2015-02-09	Middle East respiratory syndrome coronavirus isolate Camel/UAE/D1164.10/2014, complete genome
412	KP719929	29559	orf1a->orf8b	Camelus dromedarius	United Arab Emirates		2014/06	2015-02-09	Middle East respiratory syndrome coronavirus isolate Camel/UAE/D1164.11/2014, complete genome
413	KP719930	29559	orf1a->orf8b	Camelus dromedarius	United Arab Emirates		2014/06	2015-02-09	Middle East respiratory syndrome coronavirus isolate Camel/UAE/D1164.14/2014, complete genome
414	KP719931	29559	orf1a->orf8b	Camelus dromedarius	United Arab Emirates		2014/06	2015-02-09	Middle East respiratory syndrome coronavirus isolate Camel/UAE/D1339.2/2014, complete genome
415	KP719932	29559	orf1a->orf8b	Camelus dromedarius	United Arab Emirates		2014/06	2015-02-09	Middle East respiratory syndrome coronavirus isolate Camel/UAE/D1243.12/2014, complete genome
416	KP719933	29559	orf1a->orf8b	Camelus dromedarius	United Arab Emirates			2015-02-09	Middle East respiratory syndrome coronavirus isolate Camel/UAE/D1209/2014, complete genome
417	KT368824	30115	orf1a->orf8b	Camelus dromedarius	Saudi Arabia		2014/05	2015-12-17	Middle East respiratory syndrome coronavirus isolate camel/Jeddah/F13A/2014, complete genome
418	KT368825	30119	orf1a->orf8b	Camelus dromedarius	Saudi Arabia		2014/07	2015-12-17	Middle East respiratory syndrome coronavirus isolate camel/Riyadh/Ry23N/2014, complete genome
419	KT368826	30122	orf1a->orf8b	Camelus dromedarius	Saudi Arabia		2014/07	2015-12-17	Middle East respiratory syndrome coronavirus isolate camel/Riyadh/Ry84N/2014, complete genome
420	KT368827	30114	orf1a->orf8b	Camelus dromedarius	Saudi Arabia		2014/09	2015-12-17	Middle East respiratory syndrome coronavirus isolate camel/Jeddah/401/2014, complete genome
421	KT368828	30119	orf1a->orf8b	Camelus dromedarius	Saudi Arabia		2014/12	2015-12-17	Middle East respiratory syndrome coronavirus isolate camel/Jeddah/D100/2014, complete genome
422	KT368829	30118	orf1a->orf8b	Camelus dromedarius	Saudi Arabia		2014/12	2015-12-17	Middle East respiratory syndrome coronavirus isolate camel/Jeddah/D33(b)/2014, complete genome
423	KT368830	30119	orf1a->orf8b	Camelus dromedarius	Saudi Arabia		2014/12	2015-12-17	Middle East respiratory syndrome coronavirus isolate camel/Jeddah/D34/2014, complete genome
424	KT368831	30118	orf1a->orf8b	Camelus dromedarius	Saudi Arabia		2014/12	2015-12-17	Middle East respiratory syndrome coronavirus isolate camel/Jeddah/D35/2014, complete genome
425	KT368832	30118	orf1a->orf8b	Camelus dromedarius	Saudi Arabia		2014/12	2015-12-17	Middle East respiratory syndrome coronavirus isolate camel/Jeddah/D36/2014, complete genome
426	KT368833	30118	orf1a->orf8b	Camelus dromedarius	Saudi Arabia		2014/12	2015-12-17	Middle East respiratory syndrome coronavirus isolate camel/Jeddah/D38(b)/2014, complete genome
427	KT368834	30113	orf1a->orf8b	Camelus dromedarius	Saudi Arabia		2014/12	2015-12-17	Middle East respiratory syndrome coronavirus isolate camel/Jeddah/D40/2014, complete genome
428	KT368835	30119	orf1a->orf8b	Camelus dromedarius	Saudi Arabia		2014/12	2015-12-17	Middle East respiratory syndrome coronavirus isolate camel/Jeddah/D42/2014, complete genome
429	KT368836	30119	orf1a->orf8b	Camelus dromedarius	Saudi Arabia		2014/12	2015-12-17	Middle East respiratory syndrome coronavirus isolate camel/Jeddah/D43(b)/2014, complete genome
430	KT368837	30117	orf1a->orf8b	Camelus dromedarius	Saudi Arabia		2014/12	2015-12-17	Middle East respiratory syndrome coronavirus isolate camel/Jeddah/D45/2014, complete genome
431	KT368838	30118	orf1a->orf8b	Camelus dromedarius	Saudi Arabia		2014/12	2015-12-17	Middle East respiratory syndrome coronavirus isolate camel/Jeddah/D46(b)/2014, complete genome
432	KT368839	30117	orf1a->orf8b	Camelus dromedarius	Saudi Arabia		2014/12	2015-12-17	Middle East respiratory syndrome coronavirus isolate camel/Jeddah/D47/2014, complete genome
433	KT368840	30116	orf1a->orf8b	Camelus dromedarius	Saudi Arabia		2014/12	2015-12-17	Middle East respiratory syndrome coronavirus isolate camel/Jeddah/D48/2014, complete genome
434	KT368841	30110	orf1a->orf8b	Camelus dromedarius	Saudi Arabia		2014/12	2015-12-17	Middle East respiratory syndrome coronavirus isolate camel/Jeddah/D49/2014, complete genome
435	KT368842	30116	orf1a->orf8b	Camelus dromedarius	Saudi Arabia		2014/12	2015-12-17	Middle East respiratory syndrome coronavirus isolate camel/Jeddah/D50(b)/2014, complete genome
436	KT368843	30118	orf1a->orf8b	Camelus dromedarius	Saudi Arabia		2014/12	2015-12-17	Middle East respiratory syndrome coronavirus isolate camel/Jeddah/D88/2014, complete genome
437	KT368844	30109	orf1a->orf8b	Camelus dromedarius	Saudi Arabia		2014/12	2015-12-17	Middle East respiratory syndrome coronavirus isolate camel/Jeddah/D90/2014, complete genome
438	KT368845	30116	orf1a->orf8b	Camelus dromedarius	Saudi Arabia		2014/12	2015-12-17	Middle East respiratory syndrome coronavirus isolate camel/Jeddah/D92/2014, complete genome
439	KT368846	30115	orf1a->orf8b	Camelus dromedarius	Saudi Arabia		2014/11	2015-12-17	Middle East respiratory syndrome coronavirus isolate camel/Jeddah/N51/2014, complete genome
440	KT368847	30110	orf1a->orf8b	Camelus dromedarius	Saudi Arabia		2014/11	2015-12-17	Middle East respiratory syndrome coronavirus isolate camel/Jeddah/N62(b)/2014, complete genome
441	KT368848	30118	orf1a->orf8b	Camelus dromedarius	Saudi Arabia		2014/11	2015-12-17	Middle East respiratory syndrome coronavirus isolate camel/Jeddah/N68(b)/2014, complete genome
442	KT368849	30117	orf1a->orf8b	Camelus dromedarius	Saudi Arabia		2014/10	2015-12-17	Middle East respiratory syndrome coronavirus isolate camel/Jeddah/O23(b)/2014, complete genome
443	KT368850	30118	orf1a->orf8b	Camelus dromedarius	Saudi Arabia		2014/10	2015-12-17	Middle East respiratory syndrome coronavirus isolate camel/Jeddah/O24/2014, complete genome
444	KT368851	30119	orf1a->orf8b	Camelus dromedarius	Saudi Arabia		2014/10	2015-12-17	Middle East respiratory syndrome coronavirus isolate camel/Jeddah/O30/2014, complete genome
445	KT368852	30117	orf1a->orf8b	Camelus dromedarius	Saudi Arabia		2014/10	2015-12-17	Middle East respiratory syndrome coronavirus isolate camel/Jeddah/O47(b)/2014, complete genome
446	KT368853	30108	orf1a->orf8b	Camelus dromedarius	Saudi Arabia		2014/09	2015-12-17	Middle East respiratory syndrome coronavirus isolate camel/Jeddah/S100/2014, complete genome
447	KT368854	30118	orf1a->orf8b	Camelus dromedarius	Saudi Arabia		2014/09	2015-12-17	Middle East respiratory syndrome coronavirus isolate camel/Jeddah/S73/2014, complete genome
448	KT368855	30115	orf1a->orf8b	Camelus dromedarius	Saudi Arabia		2014/09	2015-12-17	Middle East respiratory syndrome coronavirus isolate camel/Jeddah/S93/2014, complete genome
449	KT368856	30117	orf1a->orf8b	Camelus dromedarius	Saudi Arabia		2014/09	2015-12-17	Middle East respiratory syndrome coronavirus isolate camel/Jeddah/S94/2014, complete genome
450	KT368857	30119	orf1a->orf8b	Camelus dromedarius	Saudi Arabia		2014/09	2015-12-17	Middle East respiratory syndrome coronavirus isolate camel/Jeddah/S99/2014, complete genome
451	KT368858	30113	orf1a->orf8b	Camelus dromedarius	Saudi Arabia		2015/01	2015-12-17	Middle East respiratory syndrome coronavirus isolate camel/Jeddah/Jd1(b)/2015, complete genome
452	KT368859	30116	orf1a->orf8b	Camelus dromedarius	Saudi Arabia		2015/01	2015-12-17	Middle East respiratory syndrome coronavirus isolate camel/Jeddah/Jd4/2015, complete genome
453	KT368860	30122	orf1a->orf8b	Camelus dromedarius	Saudi Arabia		2015/01	2015-12-17	Middle East respiratory syndrome coronavirus isolate camel/Jeddah/Jd6(b)/2015, complete genome
454	KT368861	30118	orf1a->orf8b	Camelus dromedarius	Saudi Arabia		2015/01	2015-12-17	Middle East respiratory syndrome coronavirus isolate camel/Jeddah/Jd7/2015, complete genome
455	KT368862	30120	orf1a->orf8b	Camelus dromedarius	Saudi Arabia		2015/01	2015-12-17	Middle East respiratory syndrome coronavirus isolate camel/Jeddah/Jd85/2015, complete genome
456	KT368863	30120	orf1a->orf8b	Camelus dromedarius	Saudi Arabia		2015/01	2015-12-17	Middle East respiratory syndrome coronavirus isolate camel/Jeddah/Jd86/2015, complete genome
457	KT368864	30118	orf1a->orf8b	Camelus dromedarius	Saudi Arabia		2015/01	2015-12-17	Middle East respiratory syndrome coronavirus isolate camel/Jeddah/Jd87/2015, complete genome
458	KT368865	30109	orf1a->orf8b	Camelus dromedarius	Saudi Arabia		2015/01	2015-12-17	Middle East respiratory syndrome coronavirus isolate camel/Jeddah/Jd90/2015, complete genome
459	KT368866	30114	orf1a->orf8b	Camelus dromedarius	Saudi Arabia		2015/02	2015-12-17	Middle East respiratory syndrome coronavirus isolate camel/Jeddah/Jd175/2015, complete genome
460	KT368867	30116	orf1a->orf8b	Camelus dromedarius	Saudi Arabia		2015/02	2015-12-17	Middle East respiratory syndrome coronavirus isolate camel/Jeddah/Jd199/2015, complete genome
461	KT368868	30122	orf1a->orf8b	Camelus dromedarius	Saudi Arabia		2015/03	2015-12-17	Middle East respiratory syndrome coronavirus isolate camel/Riyadh/Ry136/2015, complete genome
462	KT368869	30111	orf1a->orf8b	Camelus dromedarius	Saudi Arabia		2015/03	2015-12-17	Middle East respiratory syndrome coronavirus isolate camel/Riyadh/Ry137/2015, complete genome
463	KT368870	30110	orf1a->orf8b	Camelus dromedarius	Saudi Arabia		2015/03	2015-12-17	Middle East respiratory syndrome coronavirus isolate camel/Riyadh/Ry159(b)/2015, complete genome
464	KT368871	30118	orf1a->orf8b	Camelus dromedarius	Saudi Arabia		2015/03	2015-12-17	Middle East respiratory syndrome coronavirus isolate camel/Riyadh/Ry162/2015, complete genome
465	KT368872	30122	orf1a->orf8b	Camelus dromedarius	Saudi Arabia		2015/03	2015-12-17	Middle East respiratory syndrome coronavirus isolate camel/Riyadh/Ry173/2015, complete genome
466	KT368873	30118	orf1a->orf8b	Camelus dromedarius	Saudi Arabia		2015/03	2015-12-17	Middle East respiratory syndrome coronavirus isolate camel/Riyadh/Ry177/2015, complete genome
467	KT368874	30122	orf1a->orf8b	Camelus dromedarius	Saudi Arabia		2015/03	2015-12-17	Middle East respiratory syndrome coronavirus isolate camel/Riyadh/Ry178/2015, complete genome
468	KT368875	30113	orf1a->orf8b	Camelus dromedarius	Saudi Arabia		2015/03	2015-12-17	Middle East respiratory syndrome coronavirus isolate camel/Riyadh/Ry179/2015, complete genome
469	KT368876	30121	orf1a->orf8b	Camelus dromedarius	Saudi Arabia		2015/03	2015-12-17	Middle East respiratory syndrome coronavirus isolate camel/Riyadh/Ry63/2015, complete genome
470	KT368877	30118	orf1a->orf8b	Camelus dromedarius	Saudi Arabia		2015/03	2015-12-17	Middle East respiratory syndrome coronavirus isolate camel/Riyadh/Ry64/2015, complete genome
471	KT368878	30117	orf1a->orf8b	Camelus dromedarius	Saudi Arabia		2015/03	2015-12-17	Middle East respiratory syndrome coronavirus isolate camel/Riyadh/Ry79/2015, complete genome
472	KT368879	30107	orf1a->orf8b	Camelus dromedarius	Saudi Arabia		2015/03	2015-12-17	Middle East respiratory syndrome coronavirus isolate camel/Riyadh/Ry86/2015, complete genome
473	KT368880	30122	orf1a->orf8b	Camelus dromedarius	Saudi Arabia		2015/04	2015-12-17	Middle East respiratory syndrome coronavirus isolate camel/Taif/T3/2015, complete genome
474	KT368881	30113	orf1a->orf8b	Camelus dromedarius	Saudi Arabia		2015/04	2015-12-17	Middle East respiratory syndrome coronavirus isolate camel/Taif/T7/2015, complete genome
475	KT368882	30120	orf1a->orf8b	Camelus dromedarius	Saudi Arabia		2015/04	2015-12-17	Middle East respiratory syndrome coronavirus isolate camel/Taif/T16/2015, complete genome
476	KT368883	30122	orf1a->orf8b	Camelus dromedarius	Saudi Arabia		2015/04	2015-12-17	Middle East respiratory syndrome coronavirus isolate camel/Taif/T22/2015, complete genome
477	KT368884	30114	orf1a->orf8b	Camelus dromedarius	Saudi Arabia		2015/04	2015-12-17	Middle East respiratory syndrome coronavirus isolate camel/Taif/T68/2015, complete genome
478	KT368885	30118	orf1a->orf8b	Camelus dromedarius	Saudi Arabia		2015/04	2015-12-17	Middle East respiratory syndrome coronavirus isolate camel/Taif/T89/2015, complete genome
479	KT368886	30118	orf1a->orf8b	Camelus dromedarius	Saudi Arabia		2015/04	2015-12-17	Middle East respiratory syndrome coronavirus isolate camel/Taif/T91(b)/2015, complete genome
480	KT368887	30116	orf1a->orf8b	Camelus dromedarius	Saudi Arabia		2015/04	2015-12-17	Middle East respiratory syndrome coronavirus isolate camel/Taif/T92/2015, complete genome
481	KT368888	30116	orf1a->orf8b	Camelus dromedarius	Saudi Arabia		2015/04	2015-12-17	Middle East respiratory syndrome coronavirus isolate camel/Taif/T98/2015, complete genome
482	KT368889	30110	orf1a->orf8b	Camelus dromedarius	Saudi Arabia		2015/03	2015-12-17	Middle East respiratory syndrome coronavirus isolate camel/Taif/T150/2015, complete genome
483	KT368890	30120	orf1a->orf8b	Camelus dromedarius	Saudi Arabia		2015/03	2015-12-17	Middle East respiratory syndrome coronavirus isolate camel/Taif/T157(b)/2015, complete genome
484	KT751244	30107	orf1a->orf8b	Camelus dromedarius	United Arab Emirates			2015-12-09	Middle East respiratory syndrome coronavirus strain D2731.3/14, complete genome
485	KT877350	30121	orf1a->orf8b	Camelus dromedarius	Saudi Arabia	oronasopharynx	2014/09	2016-09-30	Middle East respiratory syndrome coronavirus isolate KSA_1725, complete genome
486	KT877351	30010	orf1a->orf8b	Camelus dromedarius	Saudi Arabia	oronasopharynx	2014/09	2016-09-30	Middle East respiratory syndrome coronavirus isolate KSA_1724, complete genome
487	KX108937	30097	orf1a->orf8b	Camelus dromedarius	United Arab Emirates		2014-06-02	2016-12-29	Middle East respiratory syndrome coronavirus isolate D1164.1/14, complete genome
488	KX108938	30101	orf1a->orf8b	Camelus dromedarius	United Arab Emirates		2014-12-13	2016-12-29	Middle East respiratory syndrome coronavirus isolate D2597.2/14, complete genome
489	KX108939	30099	orf1a->orf8b	Camelus dromedarius	United Arab Emirates		2015-01-30	2016-12-29	Middle East respiratory syndrome coronavirus isolate D252/15, complete genome
490	KX108940	30099	orf1a->orf8b	Camelus dromedarius	United Arab Emirates		2015-02-12	2016-12-29	Middle East respiratory syndrome coronavirus isolate D374/15, complete genome
491	KX108941	30099	orf1a->orf8b	Camelus dromedarius	United Arab Emirates		2015-02-14	2016-12-29	Middle East respiratory syndrome coronavirus isolate D383/15, complete genome
492	KX108942	30099	orf1a->orf8b	Camelus dromedarius	United Arab Emirates		2015-02-15	2016-12-29	Middle East respiratory syndrome coronavirus isolate D389/15, complete genome
493	KX108943	30088	orf1a->orf8b	Camelus dromedarius	United Arab Emirates		2015-04-23	2016-12-29	Middle East respiratory syndrome coronavirus isolate D998/15, complete genome
494	KX108944	30099	orf1a->orf8b	Camelus dromedarius	United Arab Emirates		2015-05-12	2016-12-29	Middle East respiratory syndrome coronavirus isolate D1157/15, complete genome
495	KX108945	30101	orf1a->orf8b	Camelus dromedarius	United Arab Emirates		2015-05-29	2016-12-29	Middle East respiratory syndrome coronavirus isolate D1271/15, complete genome
496	KX108946	30099	orf1a->orf8b	Camelus dromedarius	United Arab Emirates		2015-05-18	2016-12-29	Middle East respiratory syndrome coronavirus isolate D1189.1/15, complete genome
497	KY581695	30123	orf1a->orf8b	Camelus dromedarius	United Arab Emirates	oronasopharynx	2014-06-01	2017-12-20	Middle East respiratory syndrome-related coronavirus strain Camel/UAE_1B-A_2014, complete genome
498	KY581696	30123	orf1a->orf8b	Camelus dromedarius	United Arab Emirates	oronasopharynx	2014-03-12	2017-12-20	Middle East respiratory syndrome-related coronavirus strain Camel/UAE_1H-B_2014, complete genome
499	KY581697	30123	orf1a->orf8b	Camelus dromedarius	United Arab Emirates	oronasopharynx	2014-02-18	2017-12-20	Middle East respiratory syndrome-related coronavirus strain Camel/UAE_1H-D_2014, complete genome
500	KY581698	30123	orf1a->orf8b	Camelus dromedarius	United Arab Emirates	oronasopharynx	2014-06-01	2017-12-20	Middle East respiratory syndrome-related coronavirus strain Camel/UAE_1H-F_2014, complete genome
501	KY581699	30123	orf1a->orf8b	Camelus dromedarius	United Arab Emirates	oronasopharynx	2014-06-01	2017-12-20	Middle East respiratory syndrome-related coronavirus strain Camel/UAE_2B-E_2014, complete genome
502	KY581700	30123	orf1a->orf8b	Camelus dromedarius	United Arab Emirates	oronasopharynx	2014-02-18	2017-12-20	Middle East respiratory syndrome-related coronavirus strain Camel/UAE_3B-C_2014, complete genome
503	KY673149	30123	orf1a->orf8b	Camelus dromedarius	Oman	oronasopharynx	2015/01	2017-12-31	Middle East respiratory syndrome-related coronavirus strain Camel/Oman_1_2015, complete genome
504	MF598594	30123	orf1a->orf8b	Camelus dromedarius	United Arab Emirates	oronasopharynx	2015/03	2017-11-15	Middle East respiratory syndrome-related coronavirus strain camel/UAE_B1_2015, complete genome
505	MF598595	30123	orf1a->orf8b	Camelus dromedarius	United Arab Emirates	oronasopharynx	2015/03	2017-11-15	Middle East respiratory syndrome-related coronavirus strain camel/UAE_B2_2015, complete genome
506	MF598596	30123	orf1a->orf8b	Camelus dromedarius	United Arab Emirates	oronasopharynx	2015/03	2017-11-15	Middle East respiratory syndrome-related coronavirus strain camel/UAE_B4_2015, complete genome
507	MF598597	30123	orf1a->orf8b	Camelus dromedarius	United Arab Emirates	oronasopharynx	2015/03	2017-11-15	Middle East respiratory syndrome-related coronavirus strain camel/UAE_B5_2015, complete genome
508	MF598598	30123	orf1a->orf8b	Camelus dromedarius	United Arab Emirates	oronasopharynx	2015/03	2017-11-15	Middle East respiratory syndrome-related coronavirus strain camel/UAE_B6_2015, complete genome
509	MF598599	30123	orf1a->orf8b	Camelus dromedarius	United Arab Emirates	oronasopharynx	2015/03	2017-11-15	Middle East respiratory syndrome-related coronavirus strain camel/UAE_B7_2015, complete genome
510	MF598600	30123	orf1a->orf8b	Camelus dromedarius	United Arab Emirates	oronasopharynx	2015/03	2017-11-15	Middle East respiratory syndrome-related coronavirus strain camel/UAE_B8_2015, complete genome
511	MF598601	30123	orf1a->orf8b	Camelus dromedarius	United Arab Emirates	oronasopharynx	2015/03	2017-11-15	Middle East respiratory syndrome-related coronavirus strain camel/UAE_B9_2015, complete genome
512	MF598602	30123	orf1a->orf8b	Camelus dromedarius	United Arab Emirates	oronasopharynx	2015/03	2017-11-15	Middle East respiratory syndrome-related coronavirus strain camel/UAE_B10_2015, complete genome
513	MF598603	30123	orf1a->orf8b	Camelus dromedarius	United Arab Emirates	oronasopharynx	2015/03	2017-11-15	Middle East respiratory syndrome-related coronavirus strain camel/UAE_B11_2015, complete genome
514	MF598604	30123	orf1a->orf8b	Camelus dromedarius	United Arab Emirates	oronasopharynx	2015/03	2017-11-15	Middle East respiratory syndrome-related coronavirus strain camel/UAE_B12_2015, complete genome
515	MF598605	30123	orf1a->orf8b	Camelus dromedarius	United Arab Emirates	oronasopharynx	2015/03	2017-11-15	Middle East respiratory syndrome-related coronavirus strain camel/UAE_B13_2015, complete genome
516	MF598606	30123	orf1a->orf8b	Camelus dromedarius	United Arab Emirates	oronasopharynx	2015/03	2017-11-15	Middle East respiratory syndrome-related coronavirus strain camel/UAE_B14_2015, complete genome
517	MF598607	30123	orf1a->orf8b	Camelus dromedarius	United Arab Emirates	oronasopharynx	2015/03	2017-11-15	Middle East respiratory syndrome-related coronavirus strain camel/UAE_B15_2015, complete genome
518	MF598608	30123	orf1a->orf8b	Camelus dromedarius	United Arab Emirates	oronasopharynx	2015/03	2017-11-15	Middle East respiratory syndrome-related coronavirus strain camel/UAE_B16_2015, complete genome
519	MF598609	30123	orf1a->orf8b	Camelus dromedarius	United Arab Emirates	oronasopharynx	2015/03	2017-11-15	Middle East respiratory syndrome-related coronavirus strain camel/UAE_B17_2015, complete genome
520	MF598610	30123	orf1a->orf8b	Camelus dromedarius	United Arab Emirates	oronasopharynx	2015/03	2017-11-15	Middle East respiratory syndrome-related coronavirus strain camel/UAE_B18_2015, complete genome
521	MF598611	30123	orf1a->orf8b	Camelus dromedarius	United Arab Emirates	oronasopharynx	2015/03	2017-11-15	Middle East respiratory syndrome-related coronavirus strain camel/UAE_B19_2015, complete genome
522	MF598612	30123	orf1a->orf8b	Camelus dromedarius	United Arab Emirates	oronasopharynx	2015/03	2017-11-15	Middle East respiratory syndrome-related coronavirus strain camel/UAE_B20_2015, complete genome
523	MF598613	30123	orf1a->orf8b	Camelus dromedarius	United Arab Emirates	oronasopharynx	2015/03	2017-11-15	Middle East respiratory syndrome-related coronavirus strain camel/UAE_B21_2015, complete genome
524	MF598614	30123	orf1a->orf8b	Camelus dromedarius	United Arab Emirates	oronasopharynx	2015/03	2017-11-15	Middle East respiratory syndrome-related coronavirus strain camel/UAE_B22_2015, complete genome
525	MF598615	30123	orf1a->orf8b	Camelus dromedarius	United Arab Emirates	oronasopharynx	2015/03	2017-11-15	Middle East respiratory syndrome-related coronavirus strain camel/UAE_B23_2015, complete genome
526	MF598616	30123	orf1a->orf8b	Camelus dromedarius	United Arab Emirates	oronasopharynx	2015/03	2017-11-15	Middle East respiratory syndrome-related coronavirus strain camel/UAE_B24_2015, complete genome
527	MF598617	30123	orf1a->orf8b	Camelus dromedarius	United Arab Emirates	oronasopharynx	2015/03	2017-11-15	Middle East respiratory syndrome-related coronavirus strain camel/UAE_B25_2015, complete genome
528	MF598618	30123	orf1a->orf8b	Camelus dromedarius	United Arab Emirates	oronasopharynx	2015/03	2017-11-15	Middle East respiratory syndrome-related coronavirus strain camel/UAE_B26_2015, complete genome
529	MF598619	30123	orf1a->orf8b	Camelus dromedarius	United Arab Emirates	oronasopharynx	2015/03	2017-11-15	Middle East respiratory syndrome-related coronavirus strain camel/UAE_B27_2015, complete genome
530	MF598620	30123	orf1a->orf8b	Camelus dromedarius	United Arab Emirates	oronasopharynx	2015/03	2017-11-15	Middle East respiratory syndrome-related coronavirus strain camel/UAE_B28_2015, complete genome
531	MF598621	30123	orf1a->orf8b	Camelus dromedarius	United Arab Emirates	oronasopharynx	2015/03	2017-11-15	Middle East respiratory syndrome-related coronavirus strain camel/UAE_B29_2015, complete genome
532	MF598622	30123	orf1a->orf8b	Camelus dromedarius	United Arab Emirates	oronasopharynx	2015/03	2017-11-15	Middle East respiratory syndrome-related coronavirus strain camel/UAE_B30_2015, complete genome
533	MF598623	30123	orf1a->orf8b	Camelus dromedarius	United Arab Emirates	oronasopharynx	2015/03	2017-11-15	Middle East respiratory syndrome-related coronavirus strain camel/UAE_B31_2015, complete genome
534	MF598624	30123	orf1a->orf8b	Camelus dromedarius	United Arab Emirates	oronasopharynx	2015/03	2017-11-15	Middle East respiratory syndrome-related coronavirus strain camel/UAE_B32_2015, complete genome
535	MF598625	30123	orf1a->orf8b	Camelus dromedarius	United Arab Emirates	oronasopharynx	2015/03	2017-11-15	Middle East respiratory syndrome-related coronavirus strain camel/UAE_B33_2015, complete genome
536	MF598626	30123	orf1a->orf8b	Camelus dromedarius	United Arab Emirates	oronasopharynx	2015/03	2017-11-15	Middle East respiratory syndrome-related coronavirus strain camel/UAE_B34_2015, complete genome
537	MF598627	30123	orf1a->orf8b	Camelus dromedarius	United Arab Emirates	oronasopharynx	2015/03	2017-11-15	Middle East respiratory syndrome-related coronavirus strain camel/UAE_B35_2015, complete genome
538	MF598629	30123	orf1a->orf8b	Camelus dromedarius	United Arab Emirates	oronasopharynx	2015/03	2017-11-15	Middle East respiratory syndrome-related coronavirus strain camel/UAE_B37_2015, complete genome
539	MF598630	30123	orf1a->orf8b	Camelus dromedarius	United Arab Emirates	oronasopharynx	2015/03	2017-11-15	Middle East respiratory syndrome-related coronavirus strain camel/UAE_B38_2015, complete genome
540	MF598631	30123	orf1a->orf8b	Camelus dromedarius	United Arab Emirates	oronasopharynx	2015/03	2017-11-15	Middle East respiratory syndrome-related coronavirus strain camel/UAE_B39_2015, complete genome
541	MF598632	30123	orf1a->orf8b	Camelus dromedarius	United Arab Emirates	oronasopharynx	2015/03	2017-11-15	Middle East respiratory syndrome-related coronavirus strain camel/UAE_B40_2015, complete genome
542	MF598633	30123	orf1a->orf8b	Camelus dromedarius	United Arab Emirates	oronasopharynx	2015/03	2017-11-15	Middle East respiratory syndrome-related coronavirus strain camel/UAE_B41_2015, complete genome
543	MF598634	30123	orf1a->orf8b	Camelus dromedarius	United Arab Emirates	oronasopharynx	2015/03	2017-11-15	Middle East respiratory syndrome-related coronavirus strain camel/UAE_B42_2015, complete genome
544	MF598635	30123	orf1a->orf8b	Camelus dromedarius	United Arab Emirates	oronasopharynx	2015/03	2017-11-15	Middle East respiratory syndrome-related coronavirus strain camel/UAE_B44_2015, complete genome
545	MF598636	30123	orf1a->orf8b	Camelus dromedarius	United Arab Emirates	oronasopharynx	2015/03	2017-11-15	Middle East respiratory syndrome-related coronavirus strain camel/UAE_B45_2015, complete genome
546	MF598637	30123	orf1a->orf8b	Camelus dromedarius	United Arab Emirates	oronasopharynx	2015/03	2017-11-15	Middle East respiratory syndrome-related coronavirus strain camel/UAE_B46_2015, complete genome
547	MF598638	30123	orf1a->orf8b	Camelus dromedarius	United Arab Emirates	oronasopharynx	2015/03	2017-11-15	Middle East respiratory syndrome-related coronavirus strain camel/UAE_B47_2015, complete genome
548	MF598639	30123	orf1a->orf8b	Camelus dromedarius	United Arab Emirates	oronasopharynx	2015/03	2017-11-15	Middle East respiratory syndrome-related coronavirus strain camel/UAE_B48_2015, complete genome
549	MF598640	30123	orf1a->orf8b	Camelus dromedarius	United Arab Emirates	oronasopharynx	2015/03	2017-11-15	Middle East respiratory syndrome-related coronavirus strain camel/UAE_B49_2015, complete genome
550	MF598641	30123	orf1a->orf8b	Camelus dromedarius	United Arab Emirates	oronasopharynx	2015/03	2017-11-15	Middle East respiratory syndrome-related coronavirus strain camel/UAE_B50_2015, complete genome
551	MF598643	30123	orf1a->orf8b	Camelus dromedarius	United Arab Emirates	oronasopharynx	2015/03	2017-11-15	Middle East respiratory syndrome-related coronavirus strain camel/UAE_B52_2015, complete genome
552	MF598644	30123	orf1a->orf8b	Camelus dromedarius	United Arab Emirates	oronasopharynx	2015/03	2017-11-15	Middle East respiratory syndrome-related coronavirus strain camel/UAE_B53_2015, complete genome
553	MF598645	30123	orf1a->orf8b	Camelus dromedarius	United Arab Emirates	oronasopharynx	2015/03	2017-11-15	Middle East respiratory syndrome-related coronavirus strain camel/UAE_B54_2015, complete genome
554	MF598646	30123	orf1a->orf8b	Camelus dromedarius	United Arab Emirates	oronasopharynx	2015/03	2017-11-15	Middle East respiratory syndrome-related coronavirus strain camel/UAE_B55_2015, complete genome
555	MF598647	30123	orf1a->orf8b	Camelus dromedarius	United Arab Emirates	oronasopharynx	2015/03	2017-11-15	Middle East respiratory syndrome-related coronavirus strain camel/UAE_B56_2015, complete genome
556	MF598648	30123	orf1a->orf8b	Camelus dromedarius	United Arab Emirates	oronasopharynx	2015/03	2017-11-15	Middle East respiratory syndrome-related coronavirus strain camel/UAE_B58_2015, complete genome
557	MF598649	30123	orf1a->orf8b	Camelus dromedarius	United Arab Emirates	oronasopharynx	2015/03	2017-11-15	Middle East respiratory syndrome-related coronavirus strain camel/UAE_B59_2015, complete genome
558	MF598650	30123	orf1a->orf8b	Camelus dromedarius	United Arab Emirates	oronasopharynx	2015/03	2017-11-15	Middle East respiratory syndrome-related coronavirus strain camel/UAE_B60_2015, complete genome
559	MF598651	30123	orf1a->orf8b	Camelus dromedarius	United Arab Emirates	oronasopharynx	2015/03	2017-11-15	Middle East respiratory syndrome-related coronavirus strain camel/UAE_B61_2015, complete genome
560	MF598652	30123	orf1a->orf8b	Camelus dromedarius	United Arab Emirates	oronasopharynx	2015/03	2017-11-15	Middle East respiratory syndrome-related coronavirus strain camel/UAE_B62_2015, complete genome
561	MF598653	30123	orf1a->orf8b	Camelus dromedarius	United Arab Emirates	oronasopharynx	2015/03	2017-11-15	Middle East respiratory syndrome-related coronavirus strain camel/UAE_B63_2015, complete genome
562	MF598654	30123	orf1a->orf8b	Camelus dromedarius	United Arab Emirates	oronasopharynx	2015/03	2017-11-15	Middle East respiratory syndrome-related coronavirus strain camel/UAE_B64_2015, complete genome
563	MF598655	30123	orf1a->orf8b	Camelus dromedarius	United Arab Emirates	oronasopharynx	2015/03	2017-11-15	Middle East respiratory syndrome-related coronavirus strain camel/UAE_B65_2015, complete genome
564	MF598656	30123	orf1a->orf8b	Camelus dromedarius	United Arab Emirates	oronasopharynx	2015/03	2017-11-15	Middle East respiratory syndrome-related coronavirus strain camel/UAE_B66_2015, complete genome
565	MF598657	30123	orf1a->orf8b	Camelus dromedarius	United Arab Emirates	oronasopharynx	2015/03	2017-11-15	Middle East respiratory syndrome-related coronavirus strain camel/UAE_B67_2015, complete genome
566	MF598658	30123	orf1a->orf8b	Camelus dromedarius	United Arab Emirates	oronasopharynx	2015/03	2017-11-15	Middle East respiratory syndrome-related coronavirus strain camel/UAE_B68_2015, complete genome
567	MF598659	30123	orf1a->orf8b	Camelus dromedarius	United Arab Emirates	oronasopharynx	2015/03	2017-11-15	Middle East respiratory syndrome-related coronavirus strain camel/UAE_B69_2015, complete genome
568	MF598660	30123	orf1a->orf8b	Camelus dromedarius	United Arab Emirates	oronasopharynx	2015/03	2017-11-15	Middle East respiratory syndrome-related coronavirus strain camel/UAE_B70_2015, complete genome
569	MF598661	30123	orf1a->orf8b	Camelus dromedarius	United Arab Emirates	oronasopharynx	2015/03	2017-11-15	Middle East respiratory syndrome-related coronavirus strain camel/UAE_B71_2015, complete genome
570	MF598662	30123	orf1a->orf8b	Camelus dromedarius	United Arab Emirates	oronasopharynx	2015/03	2017-11-15	Middle East respiratory syndrome-related coronavirus strain camel/UAE_B72_2015, complete genome
571	MF598663	30123	orf1a->orf8b	Camelus dromedarius	United Arab Emirates	oronasopharynx	2015/03	2017-11-15	Middle East respiratory syndrome-related coronavirus strain camel/UAE_B73_2015, complete genome
572	MF598664	30123	orf1a->orf8b	Camelus dromedarius	United Arab Emirates	oronasopharynx	2015/03	2017-11-15	Middle East respiratory syndrome-related coronavirus strain camel/UAE_B74_2015, complete genome
573	MF598665	30123	orf1a->orf8b	Camelus dromedarius	United Arab Emirates	oronasopharynx	2015/03	2017-11-15	Middle East respiratory syndrome-related coronavirus strain camel/UAE_B75_2015, complete genome
574	MF598666	30123	orf1a->orf8b	Camelus dromedarius	United Arab Emirates	oronasopharynx	2015/03	2017-11-15	Middle East respiratory syndrome-related coronavirus strain camel/UAE_B76_2015, complete genome
575	MF598667	30123	orf1a->orf8b	Camelus dromedarius	United Arab Emirates	oronasopharynx	2015/03	2017-11-15	Middle East respiratory syndrome-related coronavirus strain camel/UAE_B77_2015, complete genome
576	MF598668	30123	orf1a->orf8b	Camelus dromedarius	United Arab Emirates	oronasopharynx	2015/03	2017-11-15	Middle East respiratory syndrome-related coronavirus strain camel/UAE_B78_2015, complete genome
577	MF598669	30123	orf1a->orf8b	Camelus dromedarius	United Arab Emirates	oronasopharynx	2015/03	2017-11-15	Middle East respiratory syndrome-related coronavirus strain camel/UAE_B79_2015, complete genome
578	MF598670	30123	orf1a->orf8b	Camelus dromedarius	United Arab Emirates	oronasopharynx	2015/03	2017-11-15	Middle East respiratory syndrome-related coronavirus strain camel/UAE_B80_2015, complete genome
579	MF598671	30123	orf1a->orf8b	Camelus dromedarius	United Arab Emirates	oronasopharynx	2015/03	2017-11-15	Middle East respiratory syndrome-related coronavirus strain camel/UAE_B81_2015, complete genome
580	MF598672	30123	orf1a->orf8b	Camelus dromedarius	United Arab Emirates	oronasopharynx	2015/03	2017-11-15	Middle East respiratory syndrome-related coronavirus strain camel/UAE_B82_2015, complete genome
581	MF598673	30123	orf1a->orf8b	Camelus dromedarius	United Arab Emirates	oronasopharynx	2015/03	2017-11-15	Middle East respiratory syndrome-related coronavirus strain camel/UAE_B83_2015, complete genome
582	MF598674	30123	orf1a->orf8b	Camelus dromedarius	United Arab Emirates	oronasopharynx	2015/03	2017-11-15	Middle East respiratory syndrome-related coronavirus strain camel/UAE_B84_2015, complete genome
583	MF598675	30123	orf1a->orf8b	Camelus dromedarius	United Arab Emirates	oronasopharynx	2015/03	2017-11-15	Middle East respiratory syndrome-related coronavirus strain camel/UAE_B85_2015, complete genome
584	MF598676	30123	orf1a->orf8b	Camelus dromedarius	United Arab Emirates	oronasopharynx	2015/03	2017-11-15	Middle East respiratory syndrome-related coronavirus strain camel/UAE_B86_2015, complete genome
585	MF598677	30123	orf1a->orf8b	Camelus dromedarius	United Arab Emirates	oronasopharynx	2015/03	2017-11-15	Middle East respiratory syndrome-related coronavirus strain camel/UAE_B87_2015, complete genome
586	MF598678	30123	orf1a->orf8b	Camelus dromedarius	United Arab Emirates	oronasopharynx	2015/03	2017-11-15	Middle East respiratory syndrome-related coronavirus strain camel/UAE_B88_2015, complete genome
587	MF598679	30123	orf1a->orf8b	Camelus dromedarius	United Arab Emirates	oronasopharynx	2015/03	2017-11-15	Middle East respiratory syndrome-related coronavirus strain camel/UAE_B90_2015, complete genome
588	MF598680	30123	orf1a->orf8b	Camelus dromedarius	United Arab Emirates	oronasopharynx	2015/03	2017-11-15	Middle East respiratory syndrome-related coronavirus strain camel/UAE_B91_2015, complete genome
589	MF598681	30123	orf1a->orf8b	Camelus dromedarius	United Arab Emirates	oronasopharynx	2015/03	2017-11-15	Middle East respiratory syndrome-related coronavirus strain camel/UAE_B92_2015, complete genome
590	MF598682	30123	orf1a->orf8b	Camelus dromedarius	United Arab Emirates	oronasopharynx	2015/03	2017-11-15	Middle East respiratory syndrome-related coronavirus strain camel/UAE_B93_2015, complete genome
591	MF598683	30123	orf1a->orf8b	Camelus dromedarius	United Arab Emirates	oronasopharynx	2015/03	2017-11-15	Middle East respiratory syndrome-related coronavirus strain camel/UAE_B95_2015, complete genome
592	MF598684	30123	orf1a->orf8b	Camelus dromedarius	United Arab Emirates	oronasopharynx	2015/03	2017-11-15	Middle East respiratory syndrome-related coronavirus strain camel/UAE_B96_2015, complete genome
593	MF598685	30123	orf1a->orf8b	Camelus dromedarius	United Arab Emirates	oronasopharynx	2015/03	2017-11-15	Middle East respiratory syndrome-related coronavirus strain camel/UAE_B97_2015, complete genome
594	MF598686	30123	orf1a->orf8b	Camelus dromedarius	United Arab Emirates	oronasopharynx	2015/03	2017-11-15	Middle East respiratory syndrome-related coronavirus strain camel/UAE_B99_2015, complete genome
595	MF598687	30123	orf1a->orf8b	Camelus dromedarius	United Arab Emirates	oronasopharynx	2015/03	2017-11-15	Middle East respiratory syndrome-related coronavirus strain camel/UAE_B100_2015, complete genome
596	MF598688	30123	orf1a->orf8b	Camelus dromedarius	United Arab Emirates	oronasopharynx	2015/03	2017-11-15	Middle East respiratory syndrome-related coronavirus strain camel/UAE_B101_2015, complete genome
597	MF598689	30121	orf1a->orf8b	Camelus dromedarius	United Arab Emirates	oronasopharynx	2015/03	2017-11-15	Middle East respiratory syndrome-related coronavirus strain camel/UAE_B102_2015, complete genome
598	MF598690	30123	orf1a->orf8b	Camelus dromedarius	United Arab Emirates	oronasopharynx	2015/03	2017-11-15	Middle East respiratory syndrome-related coronavirus strain camel/UAE_B103_2015, complete genome
599	MF598691	30123	orf1a->orf8b	Camelus dromedarius	United Arab Emirates	oronasopharynx	2015/03	2017-11-15	Middle East respiratory syndrome-related coronavirus strain camel/UAE_B104_2015, complete genome
600	MF598692	30123	orf1a->orf8b	Camelus dromedarius	United Arab Emirates	oronasopharynx	2015/03	2017-11-15	Middle East respiratory syndrome-related coronavirus strain camel/UAE_B105_2015, complete genome
601	MF598693	30123	orf1a->orf8b	Camelus dromedarius	United Arab Emirates	oronasopharynx	2015/03	2017-11-15	Middle East respiratory syndrome-related coronavirus strain camel/UAE_B106_2015, complete genome
602	MF598694	30123	orf1a->orf8b	Camelus dromedarius	United Arab Emirates	oronasopharynx	2015/03	2017-11-15	Middle East respiratory syndrome-related coronavirus strain camel/UAE_B107_2015, complete genome
603	MF598695	30123	orf1a->orf8b	Camelus dromedarius	United Arab Emirates	oronasopharynx	2015/03	2017-11-15	Middle East respiratory syndrome-related coronavirus strain camel/UAE_B108_2015, complete genome
604	MF598696	30123	orf1a->orf8b	Camelus dromedarius	United Arab Emirates	oronasopharynx	2015/03	2017-11-15	Middle East respiratory syndrome-related coronavirus strain camel/UAE_B109_2015, complete genome
605	MF598697	30123	orf1a->orf8b	Camelus dromedarius	United Arab Emirates	oronasopharynx	2015/03	2017-11-15	Middle East respiratory syndrome-related coronavirus strain camel/UAE_B110_2015, complete genome
606	MF598698	30123	orf1a->orf8b	Camelus dromedarius	United Arab Emirates	oronasopharynx	2015/03	2017-11-15	Middle East respiratory syndrome-related coronavirus strain camel/UAE_B111_2015, complete genome
607	MF598699	30123	orf1a->orf8b	Camelus dromedarius	United Arab Emirates	oronasopharynx	2015/04	2017-11-15	Middle East respiratory syndrome-related coronavirus strain camel/UAE_414485_W3_2015, complete genome
608	MF598700	30123	orf1a->orf8b	Camelus dromedarius	United Arab Emirates	oronasopharynx	2015/04	2017-11-15	Middle East respiratory syndrome-related coronavirus strain camel/UAE_414379_W3_2015, complete genome
609	MF598701	30123	orf1a->orf8b	Camelus dromedarius	United Arab Emirates	oronasopharynx	2015/04	2017-11-15	Middle East respiratory syndrome-related coronavirus strain camel/UAE_414498_W3_2015, complete genome
610	MF598702	30123	orf1a->orf8b	Camelus dromedarius	United Arab Emirates	oronasopharynx	2015/04	2017-11-15	Middle East respiratory syndrome-related coronavirus strain camel/UAE_414377_W3_2015, complete genome
611	MF598703	30123	orf1a->orf8b	Camelus dromedarius	United Arab Emirates	oronasopharynx	2015/04	2017-11-15	Middle East respiratory syndrome-related coronavirus strain camel/UAE_414480_W3_2015, complete genome
612	MF598704	30123	orf1a->orf8b	Camelus dromedarius	United Arab Emirates	oronasopharynx	2015/04	2017-11-15	Middle East respiratory syndrome-related coronavirus strain camel/UAE_414500_W3_2015, complete genome
613	MF598705	30123	orf1a->orf8b	Camelus dromedarius	United Arab Emirates	oronasopharynx	2015/04	2017-11-15	Middle East respiratory syndrome-related coronavirus strain camel/UAE_414486_W3_2015, complete genome
614	MF598706	30123	orf1a->orf8b	Camelus dromedarius	United Arab Emirates	oronasopharynx	2015/04	2017-11-15	Middle East respiratory syndrome-related coronavirus strain camel/UAE_415911_W3_2015, complete genome
615	MF598707	30123	orf1a->orf8b	Camelus dromedarius	United Arab Emirates	oronasopharynx	2015/04	2017-11-15	Middle East respiratory syndrome-related coronavirus strain camel/UAE_415915_W3_2015, complete genome
616	MF598708	30123	orf1a->orf8b	Camelus dromedarius	United Arab Emirates	oronasopharynx	2015/04	2017-11-15	Middle East respiratory syndrome-related coronavirus strain camel/UAE_414492_W3_2015, complete genome
617	MF598709	30123	orf1a->orf8b	Camelus dromedarius	United Arab Emirates	oronasopharynx	2015/04	2017-11-15	Middle East respiratory syndrome-related coronavirus strain camel/UAE_414485_W4_2015, complete genome
618	MF598710	30123	orf1a->orf8b	Camelus dromedarius	United Arab Emirates	oronasopharynx	2015/04	2017-11-15	Middle East respiratory syndrome-related coronavirus strain camel/UAE_417162_W4_2015, complete genome
619	MF598711	30123	orf1a->orf8b	Camelus dromedarius	United Arab Emirates	oronasopharynx	2015/04	2017-11-15	Middle East respiratory syndrome-related coronavirus strain camel/UAE_414481_W4_2015, complete genome
620	MF598712	30123	orf1a->orf8b	Camelus dromedarius	United Arab Emirates	oronasopharynx	2015/04	2017-11-15	Middle East respiratory syndrome-related coronavirus strain camel/UAE_414492_W4_2015, complete genome
621	MF598713	30123	orf1a->orf8b	Camelus dromedarius	United Arab Emirates	oronasopharynx	2015/04	2017-11-15	Middle East respiratory syndrome-related coronavirus strain camel/UAE_414377_W4_2015, complete genome
622	MF598714	30123	orf1a->orf8b	Camelus dromedarius	United Arab Emirates	oronasopharynx	2015/04	2017-11-15	Middle East respiratory syndrome-related coronavirus strain camel/UAE_414500_W4_2015, complete genome
623	MF598715	30123	orf1a->orf8b	Camelus dromedarius	United Arab Emirates	oronasopharynx	2015/04	2017-11-15	Middle East respiratory syndrome-related coronavirus strain camel/UAE_416452_W4_2015, complete genome
624	MF598716	30123	orf1a->orf8b	Camelus dromedarius	United Arab Emirates	oronasopharynx	2015/04	2017-11-15	Middle East respiratory syndrome-related coronavirus strain camel/UAE_414486_W4_2015, complete genome
625	MF598717	30123	orf1a->orf8b	Camelus dromedarius	United Arab Emirates	oronasopharynx	2015/04	2017-11-15	Middle East respiratory syndrome-related coronavirus strain camel/UAE_417163_W4_2015, complete genome
626	MF598719	30123	orf1a->orf8b	Camelus dromedarius	United Arab Emirates	oronasopharynx	2015/04	2017-11-15	Middle East respiratory syndrome-related coronavirus strain camel/UAE_415911_W4_2015, complete genome
627	MF598720	30123	orf1a->orf8b	Camelus dromedarius	United Arab Emirates	oronasopharynx	2015/04	2017-11-15	Middle East respiratory syndrome-related coronavirus strain camel/UAE_416452_W5_2015, complete genome
628	MF598721	30123	orf1a->orf8b	Camelus dromedarius	United Arab Emirates	oronasopharynx	2015/04	2017-11-15	Middle East respiratory syndrome-related coronavirus strain camel/UAE_416452_W6_2015, complete genome
629	MF598722	30123	orf1a->orf8b	Camelus dromedarius	United Arab Emirates	oronasopharynx	2015/04	2017-11-15	Middle East respiratory syndrome-related coronavirus strain camel/UAE_415915_W6_2015, complete genome
630	MG923466	30047	orf1a->orf8b	Camelus dromedarius	Ethiopia		2017-03-15	2018-03-20	Middle East respiratory syndrome-related coronavirus isolate MERS-CoV camel/Ethiopia/AAU-EPHI-HKU4412/2017, complete genome
631	MG923467	30077	orf1a->orf8b	Camelus dromedarius	Ethiopia		2017-03-15	2018-03-20	Middle East respiratory syndrome-related coronavirus isolate MERS-CoV camel/Ethiopia/AAU-EPHI-HKU4448/2017, complete genome
632	MG923468	30091	orf1a->orf8b	Camelus dromedarius	Ethiopia		2017-03-15	2018-03-20	Middle East respiratory syndrome-related coronavirus isolate MERS-CoV camel/Ethiopia/AAU-EPHI-HKU4458/2017, complete genome
633	MG923469	29421	orf1a->orf8b	Camelus dromedarius	Morocco		2015-03-03	2018-03-20	Middle East respiratory syndrome-related coronavirus isolate MERS-CoV camel/Morocco/CIRAD-HKU213/2015, complete genome
634	MG923470	29423	orf1a->orf8b	Camelus dromedarius	Burkina Faso		2015-02-23	2018-03-20	Middle East respiratory syndrome-related coronavirus isolate MERS-CoV camel/Burkina Faso/CIRAD-HKU434/2015, complete genome
635	MG923471	29721	orf1a->orf8b	Camelus dromedarius	Burkina Faso		2015-03-18	2018-03-20	Middle East respiratory syndrome-related coronavirus isolate MERS-CoV camel/Burkina Faso/CIRAD-HKU785/2015, complete genome
636	MG923472	29680	orf1a->orf8b	Camelus dromedarius	Nigeria		2015-01-13	2018-03-20	Middle East respiratory syndrome-related coronavirus isolate MERS-CoV camel/Nigeria/NS004/2015, complete genome
637	MG923473	29374	orf1a->orf8b	Camelus dromedarius	Burkina Faso		2015-03-16	2018-03-20	Middle East respiratory syndrome-related coronavirus isolate MERS-CoV camel/Burkina Faso/CIRAD-HKU697/2015, complete genome
638	MG923474	29454	orf1a->orf8b	Camelus dromedarius	Nigeria		2016-01-24	2018-03-20	Middle East respiratory syndrome-related coronavirus isolate MERS-CoV camel/Nigeria/NV1405/2016, complete genome
639	MG923475	29462	orf1a->orf8b	Camelus dromedarius	Nigeria		2016-02-03	2018-03-20	Middle East respiratory syndrome-related coronavirus isolate MERS-CoV camel/Nigeria/NV1657/2016, complete genome
640	MG923476	29455	orf1a->orf8b	Camelus dromedarius	Nigeria		2016-02-15	2018-03-20	Middle East respiratory syndrome-related coronavirus isolate MERS-CoV camel/Nigeria/NV1989/2016, complete genome
641	MG923477	29458	orf1a->orf8b	Camelus dromedarius	Nigeria		2016-02-17	2018-03-20	Middle East respiratory syndrome-related coronavirus isolate MERS-CoV camel/Nigeria/NV2040/2016, complete genome
642	MG923478	29462	orf1a->orf8b	Camelus dromedarius	Nigeria		2016-02-03	2018-03-20	Middle East respiratory syndrome-related coronavirus isolate MERS-CoV camel/Nigeria/NV1673/2016, complete genome
643	MG923479	29455	orf1a->orf8b	Camelus dromedarius	Nigeria		2016-02-05	2018-03-20	Middle East respiratory syndrome-related coronavirus isolate MERS-CoV camel/Nigeria/NV1712/2016, complete genome
644	MG923480	29462	orf1a->orf8b	Camelus dromedarius	Nigeria		2016-02-07	2018-03-20	Middle East respiratory syndrome-related coronavirus isolate MERS-CoV camel/Nigeria/NV1787/2016, complete genome
645	MG923481	29462	orf1a->orf8b	Camelus dromedarius	Nigeria		2016-02-16	2018-03-20	Middle East respiratory syndrome-related coronavirus isolate MERS-CoV camel/Nigeria/NV2020/2016, complete genome
646	KP405225	4062	S	Camelus dromedarius	Saudi Arabia	oronasopharynx	2013/12	2015-07-06	Middle East respiratory syndrome coronavirus isolate Al-Ahsa KSA_Camel_C8 spike protein gene, complete cds
647	KP405226	4062	S	Camelus dromedarius	Saudi Arabia	oronasopharynx	2013/11	2015-07-06	Middle East respiratory syndrome coronavirus isolate Al-Ahsa KSA_Camel_C7 spike protein gene, complete cds
648	KP405227	4062	S	Camelus dromedarius	Saudi Arabia	lung	2013/12	2015-07-06	Middle East respiratory syndrome coronavirus isolate Al-Ahsa KSA_Camel_C9 spike protein gene, complete cds
649	KP966104	4062	S	Camelus dromedarius	Saudi Arabia	oronasopharynx	2014/05	2015-07-02	Middle East respiratory syndrome coronavirus isolate Al-Ahsa KSA_Camel_C23 spike protein gene, complete cds
650	KU201953	4062	S	Camelus dromedarius	Nigeria		2015-01-13	2015-12-16	Middle East respiratory syndrome coronavirus isolate Nigeria-HKU004 spike protein (S) gene, complete cds
651	MF679171	4059	S	Camelus dromedarius	United Arab Emirates	oronasopharynx	2015/03	2017-11-25	Middle East respiratory syndrome-related coronavirus strain camel/UAE_B89_2015 spike protein (S) gene, complete cds
652	MF679172	4062	S	Camelus dromedarius	United Arab Emirates	oronasopharynx	2015/03	2017-11-25	Middle East respiratory syndrome-related coronavirus strain camel/UAE_B94_2015 spike protein (S) gene, complete cds
653	MF679173	4062	S	Camelus dromedarius	United Arab Emirates	oronasopharynx	2015/04	2017-11-25	Middle East respiratory syndrome-related coronavirus strain camel/UAE_416452_W3_2015 spike protein (S) gene, complete cds
654	MF679174	4062	S	Camelus dromedarius	United Arab Emirates	oronasopharynx	2015/04	2017-11-25	Middle East respiratory syndrome-related coronavirus strain camel/UAE_414372_W4_2015 spike protein (S) gene, complete cds
655	KY706245	7672	S->N	Camelus dromedarius	Saudi Arabia		2014-11-29	2018-05-31	Middle East respiratory syndrome-related coronavirus isolate Camel/Saudi Arabia/KFU-HKU_F2-3/2014 spike glycoprotein gene, partial cds; and Orf3, Orf4a, Orf4b, Orf5, envelope protein, membrane protein, and nucleocapsid protein genes, complete cds
656	KY706246	7672	S->N	Camelus dromedarius	Saudi Arabia		2014-11-29	2018-05-31	Middle East respiratory syndrome-related coronavirus isolate Camel/Saudi Arabia/KFU-HKU_F2-33/2014 spike glycoprotein gene, partial cds; and Orf3, Orf4a, Orf4b, Orf5, envelope protein, membrane protein, and nucleocapsid protein genes, complete cds
657	KY706247	7672	S->N	Camelus dromedarius	Saudi Arabia		2014-11-29	2018-05-31	Middle East respiratory syndrome-related coronavirus isolate Camel/Saudi Arabia/KFU-HKU_F2-51/2014 spike glycoprotein (S) gene, partial cds; and Orf3, Orf4a, Orf4b, Orf5, envelope protein, membrane protein, and nucleocapsid protein genes, complete cds
658	KJ556338	708	orf3	Camelus dromedarius	Saudi Arabia		2013-11-09	2014-03-24	Middle East respiratory syndrome coronavirus isolate Jeddah_Camel1_2013 ORF3 gene, complete cds
659	KF933384	773	orf4b	Camelus dromedarius	Qatar		2013-10-17	2013-12-19	Middle East respiratory syndrome coronavirus ORF4b gene, complete cds
660	KJ573793	761	orf4b	Camelus dromedarius	Oman		2013	2014-05-03	Middle East respiratory syndrome coronavirus ORF4b gene, complete cds
661	KJ556337	689	E->M	Camelus dromedarius	Saudi Arabia		2013-11-09	2014-03-24	Middle East respiratory syndrome coronavirus isolate Jeddah_Camel1_2013 E protein gene, complete cds; and M protein gene, partial cds
662	KT275309	1242	N	Camelus dromedarius	United Arab Emirates		2015-05-09	2015-12-17	Middle East respiratory syndrome coronavirus isolate ADFCA-HKU4 nucleocapsid gene, complete cds
663	KT275310	1242	N	Camelus dromedarius	United Arab Emirates		2015-05-09	2015-12-17	Middle East respiratory syndrome coronavirus isolate ADFCA-HKU5 nucleocapsid gene, complete cds

## Sheet: Table S2
Variables	A	T	G	C	AT	GC	GC12	GC3	GC3s	T3s	C3s	A3s	G3s	CAI-1	CAI-2	ENC	RCDI-Hum	RCDI-Cam	L_aa	Gravy	Aromo	Axis1	Axis2	Axis-3
T	-0.881***
G	0.73***	-0.824***
C	0.303***	-0.614***	0.155***
AT	-0.69***	0.951***	-0.78***	-0.739***
GC	0.69***	-0.951***	0.78***	0.739***	-1***
GC12	0.661***	-0.727***	0.412***	0.627***	-0.678***	0.678***
GC3	0.345***	-0.64***	0.691***	0.443***	-0.752***	0.752***	0.026
GC3s	0.35***	-0.646***	0.654***	0.491***	-0.757***	0.757***	0.045**	0.989***
T3s	-0.355***	0.597***	-0.617***	-0.409***	0.679***	-0.679***	-0.048**	-0.882***	-0.875***
C3s	0.033*	-0.265***	0.199***	0.39***	-0.383***	0.383***	-0.129***	0.636***	0.641***	-0.405***
A3s	0.453***	-0.357***	0.379***	-0.015	-0.249***	0.249***	0.03	0.312***	0.305***	-0.676***	-0.106***
G3s	0.509***	-0.673***	0.733***	0.307***	-0.694***	0.694***	0.09***	0.863***	0.881***	-0.789***	0.26***	0.406***
CAI-1	0.349***	-0.21***	0.062***	0.079***	-0.092***	0.092***	0.208***	-0.064***	-0.014	0.36***	0.171***	-0.365***	0.106***
CAI-2	0.535***	-0.552***	0.401***	0.346***	-0.492***	0.492***	0.245***	0.448***	0.505***	-0.189***	0.441***	-0.044**	0.563***	0.844***
ENC	0.016	-0.195***	0.33***	0.099***	-0.288***	0.288***	-0.405***	0.754***	0.712***	-0.588***	0.693***	0.184***	0.547***	0.096***	0.426***
RCDI-Hu	-0.306***	0.387***	-0.47***	-0.11***	0.39***	-0.39***	-0.009	-0.522***	-0.5***	0.11***	-0.705***	0.36***	-0.357***	-0.493***	-0.597***	-0.529***
RCDI-Cam	-0.4***	0.542***	-0.576***	-0.272***	0.565***	-0.565***	-0.181***	-0.606***	-0.589***	0.199***	-0.667***	0.34***	-0.468***	-0.494***	-0.651***	-0.506***	0.973***
L_aa	0.093***	0.102***	0.24***	-0.6***	0.216***	-0.216***	-0.162***	-0.15***	-0.155***	0.278***	-0.14***	-0.183***	-0.012	0.155***	0.014	-0.197***	-0.31***	-0.228***
Gravy	-0.731***	0.634***	-0.311***	-0.439***	0.49***	-0.49***	-0.803***	0.055**	0.013	-0.203***	0.076***	0.18***	-0.133***	-0.655***	-0.57***	0.338***	0.304***	0.411***	-0.074***
Aromo	-0.53***	0.723***	-0.525***	-0.631***	0.757***	-0.757***	-0.797***	-0.316***	-0.328***	0.422***	0.165***	-0.221***	-0.378***	0.253***	0.013	0.3***	-0.109***	0.087***	0.125***	0.47***
Axis1	0.257***	-0.565***	0.558***	0.497***	-0.695***	0.695***	0.326***	0.654***	0.648***	-0.688***	0.154***	0.218***	0.577***	-0.512***	-0.117***	0.084***	-0.114***	-0.251***	-0.085***	-0.022	-0.783***
Axis2	0.253***	-0.39***	0.385***	0.263***	-0.429***	0.429***	-0.065***	0.641***	0.684***	-0.493***	0.409***	0.189***	0.739***	0.503***	0.815***	0.671***	-0.346***	-0.411***	-0.192***	-0.088***	0.089***	0.009
Axis-3	-0.033	-0.105***	-0.073***	0.365***	-0.181***	0.181***	0.431***	-0.14***	-0.122***	0.476***	-0.004	-0.835***	-0.117***	0.507***	0.297***	-0.232***	-0.335***	-0.431***	0.061***	-0.575***	-0.22***	-0.001	-0.006
Axis-4	0.424***	-0.303***	0.276***	-0.004	-0.185***	0.185***	0.46***	-0.16***	-0.192***	-0.048**	-0.707***	0.402***	0.142***	-0.008	-0.037**	-0.267***	0.48***	0.351***	-0.084***	-0.301***	-0.438***	0.014	0.002	-0.002
